# Supplementary material for: Genome-wide cross-trait analysis of vascular dementia and Alzheimer’s disease highlights novel loci and lung-brain axis
Source: medRxiv preprint, doi:10.64898/2026.02.27.26345967, version 1 (2026-03-02)
Supplement: Supplemental tables will be used for the link to the file on the preprint site. [file 345967_file10.xlsx]

## Sheet: Supplementary Table legends
Supplementary Table legends	Description
Supplementary Table 1	Demographic characteristics of studies included in the GWAS meta-analysis of VD
Supplementary Table 2	Genome-wide significant (P<5.00E-08) independent variants in the VD GWAS Stage1
Supplementary Table 3	Genome-wide significant (P<5.00E-08) lead variants in the VD GWAS Stage1
Supplementary Table 4	Summary of 29 associated signals (P<5.00E-08) at 11 loci in the stepwise conditional analysis of the VD GWAS Stage1
Supplementary Table 5	Selected datasets for gene mapping from FUMA
Supplementary Table 6	The prioritized genes of Stage1 mapped by eQTL, positional, and chromatin interaction using FUMA.
Supplementary Table 7	Genome-wide significant (P<5.00E-08) independent variants in the VD GWAS Stage2
Supplementary Table 8	Genome-wide significant (P<5.00E-08) lead variants in the VD GWAS Stage2
Supplementary Table 9	Summary of 55 associated signals (P<5.00E-08) at 38 loci in the stepwise conditional analysis of the VD GWAS Stage2
Supplementary Table 10	The prioritized genes of Stage2 mapped by eQTL, positional, and chromatin interaction using FUMA.
Supplementary Table 11	Functional annotation of genome-wide significant independent SNPs and their LD proxies (r²≥0.6) in VD GWAS Stage1 using ANNOVAR
Supplementary Table 12	Enrichment test of functional annotations in Stage1.
Supplementary Table 13	Characterization of candidate variants in VD GWAS Stage1.
Supplementary Table 14	Functional annotation of genome-wide significant independent SNPs and their LD proxies (r²≥0.6) in VD GWAS Stage2 using ANNOVAR
Supplementary Table 15	Enrichment test of functional annotations in Stage2.
Supplementary Table 16	Characterization of candidate variants in VD GWAS Stage2.
Supplementary Table 17	Results from MAGMA gene-based tests with PFDR<0.05 for the VD GWAS Stage1
Supplementary Table 18	Results from MAGMA gene-set enrichment analysis with PFDR<0.05 for the VD GWAS Stage1
Supplementary Table 19	The gene-set of the differentially expressed genes in GTEx v8 across 30 tissues of the VD GWAS Stage1.
Supplementary Table 20	GWAS summary-level data of pulmonary function traits for genetic correlations with VD using LDSC.
Supplementary Table 21	Genetic correlation between vascular dementia and pulmonary function traits.
Supplementary Table 22	Results of the Polygenic Priority Score (PoPS) analysis for VD using Stage 1 GWAS summary statistics
Supplementary Table 23	Results from TWAS analysis of VD GWAS Stage1 using cis_eQTL data from different tissues, for genes with PFDR<0.05
Supplementary Table 24	Results from COLOC analysis of VD GWAS Stage1 using cis_eQTL data from different tissues.
Supplementary Table 25	Results from SMR analysis of VD GWAS Stage1 using cis_eQTL data from different datasets
Supplementary Table 26	Results from SMR analysis of VD GWAS Stage1 using cis_scQTL data from different cell types
Supplementary Table 27	Summary of AD-VD GWAS meta-analysis results for identified loci reaching genome-wide significance by METAL
Supplementary Table 28	Summary of AD-VD GWAS meta-analysis results for identified loci reaching genome-wide significance by MTAG
Supplementary Table 29	Genome-wide significant (P<5.00E-08) independent variants in the AD-VD GWAS
Supplementary Table 30	Genome-wide significant (P<5.00E-08) lead variants in the AD-VD GWAS
Supplementary Table 31	Functional annotation of genome-wide significant independent SNPs and their LD proxies (r²≥0.6) in AD-VD GWAS ANNOVAR
Supplementary Table 32	Characterization of candidate variants in AD-VD GWAS.
Supplementary Table 33	The prioritized genes of AD-VD GWAS mapped by eQTL, positional, and chromatin interaction using FUMA.
Supplementary Table 34	Results from MAGMA gene-based tests with PFDR<0.05 for the AD-VD GWAS
Supplementary Table 35	Results of the Polygenic Priority Score (PoPS) analysis for VD using Stage 2 GWAS summary statistics
Supplementary Table 36	Results from MAGMA gene-set enrichment analysis with PFDR<0.05 for the AD-VD GWAS
Supplementary Table 37	The gene-set of the differentially expressed genes in GTEx v8 across 30 tissues of the AD-VD GWAS.
Supplementary Table 38	The prioritized genes by 29 integrative approaches.
Supplementary Table 39	List of cell type-specific genes differentially expressed in GSE213897
Supplementary Table 40	List of cell type-specific genes differentially expressed in GSE282111
Supplementary Table 41	Drug-gene interactions for all the prioritized genes of the VD GWAS.

## Sheet: Supplementary Table 1
Supplementary Table 1. Demographic characteristics of studies included in the GWAS meta-analysis of VD
Ancestry	Dataset	N cases	N controls	Sample Size	N
EUR	Finngen	3624	475484	479108	937548
	UKBB	2074	456366	458440
SAS	G&H	119	43659	43778	43778
Cross	MGBB	69	52374	52443	52443
METAL	Finngen+UKBB+MGBB+G&H	5886	1027883	1033769	1033769

## Sheet: Supplementary Table 2
Supplementary Table 2. Genome-wide significant (P<5.00E-08) independent variants in the VD GWAS Stage1
GenomicLocus	uniqID	rsID	chr	pos	p	nSNPs	nGWASSNPs
1	5:148037600:A:G	rs564080066	5	148037600	4.294e-08	11	1
2	8:27462481:A:G	rs7982	8	27462481	7.615e-09	11	8
3	19:45041818:G:T	rs1661184	19	45041818	1.93e-08	2	2
3	19:45284627:A:G	rs80168591	19	45284627	1.488e-11	1	1
3	19:45302277:C:T	rs139997344	19	45302277	1.803e-08	2	2
3	19:45324138:A:G	rs28399637	19	45324138	5.032e-13	1	1
3	19:45324756:C:G	rs28399664	19	45324756	8.171e-23	2	2
3	19:45341948:A:G	rs10407439	19	45341948	4.162e-09	10	6
3	19:45344722:A:G	rs28615360	19	45344722	4.223e-10	6	6
3	19:45346666:C:G	rs148601586	19	45346666	1.142e-12	1	1
3	19:45351516:C:G	rs41289512	19	45351516	3.355e-37	4	4
3	19:45356141:C:T	rs2972558	19	45356141	1.468e-11	1	1
3	19:45357377:C:T	rs4803764	19	45357377	5.338e-12	26	20
3	19:45357939:A:G	rs2927468	19	45357939	2.299e-25	2	1
3	19:45359945:A:G	rs183610051	19	45359945	3.117e-12	1	1
3	19:45361646:A:G	rs365653	19	45361646	6.986e-10	4	2
3	19:45363820:G:T	rs138607350	19	45363820	7.111e-16	1	1
3	19:45382034:A:G	rs6859	19	45382034	7.269e-16	2	2
3	19:45382675:A:G	rs41290120	19	45382675	1.283e-08	2	2
3	19:45384931:A:G	rs79701229	19	45384931	3.175e-15	1	1
3	19:45385303:C:T	rs12609102	19	45385303	1.101e-13	8	2
3	19:45385356:A:C	rs144261139	19	45385356	1.079e-11	2	2
3	19:45395266:A:G	rs157580	19	45395266	6.787e-23	2	2
3	19:45396144:C:T	rs11556505	19	45396144	7.96e-93	13	12
3	19:45396219:C:T	rs157582	19	45396219	4.328e-85	8	7
3	19:45398633:C:G	rs11668327	19	45398633	2.01e-16	1	1
3	19:45404691:A:G	rs405697	19	45404691	2.543e-11	1	1
3	19:45406673:A:G	rs10119	19	45406673	1.668e-82	1	1
3	19:45407788:A:G	rs7259620	19	45407788	1.078e-36	19	17
3	19:45408564:A:T	rs449647	19	45408564	4.509e-13	1	1
3	19:45411941:C:T	rs429358	19	45411941	3.32e-199	14	13
3	19:45412079:C:T	rs7412	19	45412079	8.928e-15	4	4
3	19:45412955:A:C	rs1081105	19	45412955	3.054e-29	16	13
3	19:45413366:C:T	rs1081106	19	45413366	4.075e-11	2	2
3	19:45413576:C:T	rs75627662	19	45413576	3.048e-79	8	7
3	19:45416291:C:T	rs59325138	19	45416291	5.784e-29	7	6
3	19:45421100:A:G	rs3925681	19	45421100	2.227e-22	6	5
3	19:45421877:A:G	rs484195	19	45421877	4.353e-21	7	6
3	19:45424514:A:C	rs157592	19	45424514	1.67e-121	8	8
3	19:45429543:C:T	rs71352239	19	45429543	4.792e-16	6	5
3	19:45429708:C:G	rs60049679	19	45429708	9.463e-12	1	1
3	19:45438554:C:T	rs7254133	19	45438554	1.117e-12	1	1
3	19:45448465:G:T	rs5167	19	45448465	3.683e-13	59	42
3	19:45514061:A:G	rs187270432	19	45514061	4.182e-10	2	2
3	19:45557302:A:G	rs193187396	19	45557302	1.215e-11	2	2
3	19:45696782:A:G	rs76726728	19	45696782	5.413e-11	12	5
3	19:45713116:A:C	rs183110257	19	45713116	1.527e-08	14	10
3	19:45959322:A:G	rs117034857	19	45959322	7.414e-11	9	5
GenomicLocus : the number identifier used to refer to independent loci identifed by this GWAS
uniqID : unique ID of SNPs consists of chromosome:position:allele1:allele2 where alleles are alphabetically ordered
chr : chromosome
pos : base pair position on hg19 (GRCh37)
p : Meta analysis effect estimates were tested for significance using the two-sided z-test.
nSNPs : number of SNPs which are in LD of the independent significant SNP given r2, including non-GWAS-tagged SNPs (which are extracted from the reference panel)
nGWAS SNPs : number of GWAS-tagged SNPs which are in LD of the independent sig. SNP given r2.

## Sheet: Supplementary Table 3
Supplementary Table 3. Genome-wide significant (P<5.00E-08) lead variants in the VD GWAS Stage1
GenomicLocus	uniqID	rsID	chr	pos	p	nIndSigSNPs	IndSigSNPs
1	5:148037600:A:G	rs564080066	5	148037600	4.294e-08	1	rs564080066
2	8:27462481:A:G	rs7982	8	27462481	7.615e-09	1	rs7982
3	19:45041818:G:T	rs1661184	19	45041818	1.93e-08	1	rs1661184
3	19:45284627:A:G	rs80168591	19	45284627	1.488e-11	3	rs80168591;rs148601586;rs183610051
3	19:45324138:A:G	rs28399637	19	45324138	5.032e-13	2	rs28399637;rs4803764
3	19:45324756:C:G	rs28399664	19	45324756	8.171e-23	3	rs28399664;rs41289512;rs11556505
3	19:45357939:A:G	rs2927468	19	45357939	2.299e-25	4	rs2927468;rs10407439;rs2972558;rs4803764
3	19:45363820:G:T	rs138607350	19	45363820	7.111e-16	2	rs138607350;rs139997344
3	19:45382034:A:G	rs6859	19	45382034	7.269e-16	2	rs6859;rs11556505
3	19:45384931:A:G	rs79701229	19	45384931	3.175e-15	3	rs79701229;rs148601586;rs183610051
3	19:45385303:C:T	rs12609102	19	45385303	1.101e-13	3	rs12609102;rs76726728;rs117034857
3	19:45385356:A:C	rs144261139	19	45385356	1.079e-11	3	rs144261139;rs1081105;rs28615360
3	19:45395266:A:G	rs157580	19	45395266	6.787e-23	10	rs157580;rs157582;rs11668327;rs405697;rs7259620;rs1081106;rs59325138;rs484195;rs157592;rs2972558
3	19:45408564:A:T	rs449647	19	45408564	4.509e-13	5	rs449647;rs365653;rs41290120;rs11668327;rs10119
3	19:45411941:C:T	rs429358	19	45411941	3.32e-199	11	rs429358;rs1081105;rs75627662;rs59325138;rs484195;rs157592;rs41289512;rs11556505;rs157582;rs10119;rs7259620
3	19:45412079:C:T	rs7412	19	45412079	8.928e-15	4	rs7412;rs75627662;rs365653;rs41290120
3	19:45421100:A:G	rs3925681	19	45421100	2.227e-22	11	rs3925681;rs484195;rs157592;rs71352239;rs7254133;rs157582;rs11668327;rs10119;rs7259620;rs75627662;rs59325138
3	19:45429708:C:G	rs60049679	19	45429708	9.463e-12	2	rs60049679;rs157592
3	19:45448465:G:T	rs5167	19	45448465	3.683e-13	1	rs5167
3	19:45557302:A:G	rs193187396	19	45557302	1.215e-11	2	rs193187396;rs187270432
3	19:45713116:A:C	rs183110257	19	45713116	1.527e-08	1	rs183110257
Genomi Locus : Index of assigned genomic locus matched with "Genomic risk loci" table. Multiple lead SNPs can be assigned to the same genomic locus.
uniqID : Unique ID of SNPs consisting of chr:position:allele1:allele2 where alleles are alphabetically ordered.
rsID : rsID based on dbSNP build 146.
chr : chromosome
pos : position on hg19
P-value : P-value (from the VD GWAS Stage1).
nIndSigSNPs : Number of independent significant SNPs which are in LD with the lead SNP at r2 0.1.
IndSigSNPs : rsID of independent significant SNPs which are in LD with the lead SNP at r2 0.1.

## Sheet: Supplementary Table 4
Supplementary Table 4. Summary of 29 associated signals (P<5.00E-08) at 11 loci in the stepwise conditional analysis of the VD GWAS Stage1
Chr	SNP	Position	A1	A1 Freq	Beta	SE	p-value	N	Freq Ref	Beta (conditional)	SE (conditional)	p-value (conditional)	LD r
5	rs564080066	148037600	A	0.9977	-1.0203	0.1862	4.26308e-08	1141350	0.999006	-1.0203	0.186202	4.26476e-08	0
8	rs7982	27462481	A	0.4112	-0.1134	0.0196	7.22049e-09	976272	0.385686	-0.1134	0.0196003	7.22462e-09	0
19	rs117671432	35897256	A	0.0195	-0.1371	0.0861	0.11131	640661	0.00497018	-1.06396	0.0890315	6.46657e-33	0.0135247
19	rs151024938	36503588	T	0.9884	0.2392	0.1041	0.0215737	730842	0.991054	0.995271	0.107259	1.70826e-20	0.00602429
19	rs539665496	39239055	A	0.0045	0.0681	0.146	0.640902	950953	0.000994036	-1.45899	0.150387	2.96871e-22	0.121286
19	rs62120677	39971401	T	0.0948	0.0626	0.0337	0.0632306	931760	0.0576541	0.662934	0.0379295	2.10498e-68	-0.0420765
19	rs143278392	41244149	T	0.001	1.1144	0.2612	1.98597e-05	1332300	0.00695825	2.29324	0.262649	2.52022e-18	-0.00750593
19	rs527435212	43578323	T	0.0047	-0.0893	0.1591	0.574605	766878	0.00198807	-2.37832	0.168987	5.48883e-45	0.04847
19	rs344783	44172188	T	0.4584	0.0405	0.0192	0.0349122	992181	0.482107	0.12772	0.0196604	8.23096e-11	0.000426856
19	rs36101414	44464461	T	0.9696	-0.2005	0.0546	0.000240508	1033380	0.973161	-0.576455	0.0580667	3.16218e-23	0.0150479
19	rs182943886	44636030	A	0.0005	-1.0367	0.4397	0.0183864	939832	0.00198807	-4.7271	0.451785	1.27532e-25	0.00399202
19	rs181195470	45213155	A	0.9905	-0.4075	0.0998	4.44262e-05	968884	0.998012	-1.19541	0.105227	6.59251e-30	-0.0685768
19	rs7254776	45227742	T	0.6708	0.0784	0.0205	0.000131096	978479	0.61829	0.128543	0.0212722	1.51497e-09	0.0655402
19	rs2927468	45357939	A	0.4767	-0.1998	0.0192	2.32189e-25	987353	0.44831	-0.315626	0.020335	2.48801e-54	0.149695
19	rs429358	45411941	T	0.8331	-0.6945	0.0231	1.39296e-198	1222980	0.84493	-1.2273	0.0280121	0	0.099245
19	rs7412	45412079	T	0.0648	-0.321	0.0414	8.93071e-15	874195	0.0626243	-0.438272	0.0425049	6.2791e-25	-0.0165902
19	rs185975215	46979409	A	0.0021	-0.3128	0.2024	0.122236	1057770	0.000994036	-8.58011	0.363455	3.25845e-123	-0.00281997
19	rs187641092	47567435	A	0.007	-0.0799	0.1303	0.539744	769453	0.00198807	-3.11564	0.173062	1.84598e-72	0.00281997
19	rs187846895	47892189	C	0.9947	0.0909	0.1329	0.493992	975215	0.999006	3.96083	0.226604	2.06795e-68	-0.0657877
19	rs6509368	48749228	A	0.4783	-0.0212	0.0193	0.27201	976972	0.454274	-0.184073	0.0200612	4.49066e-20	-0.0322903
19	rs74732309	51013118	A	0.2666	-0.0557	0.0217	0.0102636	986268	0.237575	-0.26543	0.0227062	1.43792e-31	0.0297652
19	rs57897227	51283724	A	0.3044	-0.0176	0.0211	0.404212	963272	0.308151	-0.232642	0.0220193	4.31138e-26	-0.0849716
19	rs17779578	52633470	A	0.2048	0.0293	0.024	0.222149	968031	0.212724	0.287151	0.0250919	2.52076e-30	-0.0278651
19	rs188425094	53323262	C	0.0176	-0.1645	0.0734	0.0250167	974817	0.0149105	-0.820569	0.0757723	2.4977e-27	0.0365571
19	rs10415123	53447690	A	0.1036	0.0485	0.0317	0.126025	973055	0.0914513	0.387496	0.0331207	1.28203e-31	-4.93839e-05
19	rs8101977	53467452	A	0.7914	-0.0517	0.0239	0.0305273	962965	0.755467	-0.166103	0.0250385	3.26932e-11	0.0920946
19	rs7257223	53846311	A	0.9094	0.0421	0.0345	0.222355	925969	0.879722	0.259124	0.0352778	2.05398e-13	-0.0690865
19	rs147841877	54947332	C	0.0253	-0.17	0.0638	0.00770853	904654	0.0109344	-0.7598	0.0665162	3.2181e-30	0.0115822
19	rs2431834	56281001	T	0.9927	-0.1467	0.1111	0.186691	1015190	0.997018	-5.77737	0.259486	8.13075e-110	0
Chr : chromosome
Position : base pair position (GRCh37)
A1 : coded allele
A1 Freq : coded allele frequency
Beta : unconditional effect size
SE : standard error
p-value ：Meta analysis effect estimates were tested for significance using the two-sided z-test.
N : effective sample size
Freq Ref : allele frequency in LD reference genotype data
Beta/SE/p-value (conditional) : effect size/SE/p-value of SNP conditional on leading SNP(s) in locus
LD r : linkage disequilibrium r measurement between SNP and leading SNP.

## Sheet: Supplementary Table 5
Supplementary Table 5. Selected datasets for gene mapping from FUMA
Category	Publication year	Tissue type	Datasets	Sample size	Data source
Blood eQTL browser	2013	Peripheral blood	BloodeQTL.txt.gz	5,311 peripheral blood samples from 7 studies	http://genenetwork.nl/bloodeqtlbrowser/
BIOS QTL browser	2017	Peripheral blood	BIOS_eQTL_geneLevel.txt.gz	2,116 whole peripheral blood samples of healthy adults from 4 Dutch cohorts	http://genenetwork.nl/biosqtlbrowser/
BRAINEAC	2014	Cerebellar cortex	CRBL.txt.gz	134 neuropathologically confirmed control individuals of European descent from UK Brain Expression Consortium	http://www.braineac.org/
		Frontal cortex	FCTX.txt.gz
		Hippocampus	HIPP.txt.gz
		Inferior olivary nucleus (sub-dissected from the medulla)	MEDU.txt.gz
		Occipital cortex	OCTX.txt.gz
		Putamen (at the level of the anterior commissure)	PUTM.txt.gz
		Substantia nigra	SNIG.txt.gz
		Temporal cortex	TCTX.txt.gz
		Thalamus (at the level of the lateral geniculate nucleus)	THAL.txt.gz
		Intralobular white matter	WHMT.txt.gz
		aveALL	aveALL.txt.gz
xQTLServer	2017	Brain	xQTLServer_eQTLs.txt.gz	494 dorsolateral prefrontal cortex samples	http://mostafavilab.stat.ubc.ca/xqtl/
CommonMind Consortium	2016	Brain	CMC_SVA_cis.txt.gz	Post-mortem brain samples from 467 Caucasian individuals	https://www.synapse.org//#!Synapse:syn5585484
			CMC_NoSVA_cis.txt.gz,
eQTLGen	2018	Peripheral blood	eQTLGen_cis_eQTLs.txt.gz	Meta-analysis of cis-eQTLs from 37 datasets with a total of 31,684 individuals	http://www.eqtlgen.org/index.html
PsychENCODE	2018	Brain	PsychENCODE_eQTLs.txt.gz	The eQTLs were identified from 1,387 individuals	http://resource.psychencode.org
GTEx v8	2023	Adipose Subcutaneous	Adipose_Subcutaneous.txt.gz	581	http://www.gtexportal.org/home/datasets
		Adipose Visceral Omentum	Adipose_Visceral_Omentum.txt.gz	469
		Adrenal Gland	Adrenal_Gland.txt.gz	233
		Cells EBV-transformed lymphocytes	Cells_EBV-transformed_lymphocytes.txt.gz	147
		Whole Blood	Whole_Blood.txt.gz	670
		Artery Aorta	Artery_Aorta.txt.gz	387
		Artery Coronary	Artery_Coronary.txt.gz	213
		Artery Tibial	Artery_Tibial.txt.gz	584
		Brain Amygdala	Brain_Amygdala.txt.gz	129
		Brain Anterior cingulate cortex BA24	Brain_Anterior_cingulate_cortex_BA24.txt.gz	147
		Brain Caudate basal ganglia	Brain_Caudate_basal_ganglia.txt.gz	194
		Brain Cerebellar Hemisphere	Brain_Cerebellar_Hemisphere.txt.gz	175
		Brain Cerebellum	Brain_Cerebellum.txt.gz	209
		Brain Cortex	Brain_Cortex.txt.gz	205
		Brain Frontal Cortex BA9	Brain_Frontal_Cortex_BA9.txt.gz	175
		Brain Hippocampus	Brain_Hippocampus.txt.gz	165
		Brain Hypothalamus	Brain_Hypothalamus.txt.gz	170
		Brain Nucleus accumbens basal ganglia	Brain_Nucleus_accumbens_basal_ganglia.txt.gz	202
		Brain Putamen basal ganglia	Brain_Putamen_basal_ganglia.txt.gz	170
		Brain Spinal cord cervical c-1	Brain_Spinal_cord_cervical_c-1.txt.gz	126
		Brain Substantia nigra	Brain_Substantia_nigra.txt.gz	114
		Breast Mammary Tissue	Breast_Mammary_Tissue.txt.gz	396
		Colon Sigmoid	Colon_Sigmoid.txt.gz	318
		Colon Transverse	Colon_Transverse.txt.gz	368
		Esophagus Gastroesophageal Junction	Esophagus_Gastroesophageal_Junction.txt.gz	330
		Esophagus Mucosa	Esophagus_Mucosa.txt.gz	497
		Esophagus Muscularis	Esophagus_Muscularis.txt.gz	465
		Heart Atrial Appendage	Heart_Atrial_Appendage.txt.gz	372
		Heart Left Ventricle	Heart_Left_Ventricle.txt.gz	386
		Kidney Cortex	Kidney_Cortex.txt.gz	73
		Liver	Liver.txt.gz	208
		Lung	Lung.txt.gz	515
		Muscle Skeletal	Muscle_Skeletal.txt.gz	706
		Nerve Tibial	Nerve_Tibial.txt.gz	532
		Ovary	Ovary.txt.gz	167
		Pancreas	Pancreas.txt.gz	305
		Pituitary	Pituitary.txt.gz	237
		Prostate	Prostate.txt.gz	221
		Minor Salivary Gland	Minor_Salivary_Gland.txt.gz	144
		Cells Clustured fibroblasts	Cells_Cultured_fibroblasts.txt.gz	483
		Skin Not Sun Exposed Suprapubic	Skin_Not_Sun_Exposed_Suprapubic.txt.gz	517
		Skin Sun Exposed Lower leg	Skin_Sun_Exposed_Lower_leg.txt.gz	605
		Small Intestine Terminal Ileum	Small_Intestine_Terminal_Ileum.txt.gz	174
		Spleen	Spleen.txt.gz	227
		Stomach	Stomach.txt.gz	324
		Testis	Testis.txt.gz	322
		Thyroid	Thyroid.txt.gz	574
		Uterus	Uterus.txt.gz	142
		Vagina	Vagina.txt.gz	156
eQTLcatalogue	2018	Brain	BrainSeq_ge_brain.txt.gz	484	https://github.com/eQTL-Catalogue/eQTL-Catalogue-resources/blob/master/tabix/tabix_ftp_paths.tsv
	2017	Peripheral blood	Lepik_2017_ge_blood.txt.gz	491	https://github.com/eQTL-Catalogue/eQTL-Catalogue-resources/blob/master/tabix/tabix_ftp_paths.tsv
	2015	Peripheral blood	TwinsUK_ge_blood.txt.gz	1364	https://github.com/eQTL-Catalogue/eQTL-Catalogue-resources/blob/master/tabix/tabix_ftp_paths.tsv
Chromatin interaction mapping	2018	Brain	EP_links_oneway.txt.gz	-	http://resource.psychencode.org/
	2018	Brain	Promoter_anchored_loops.txt.gz	-	http://resource.psychencode.org/
	2019	Brain	Adult_Cortex.txt.gz	-	https://doi.org/10.1101/406330
	2019	Brain	Fetal_Cortex.txt.gz	-	https://doi.org/10.1101/406330
	2017	Hi-C of 21 tissue/cell types	-	-	https://www.ncbi.nlm.nih.gov/geo/query/acc.cgi?acc=GSE87112

## Sheet: Supplementary Table 6
Supplementary Table 6. The prioritized genes of Stage1 mapped by eQTL, positional, and chromatin interaction using FUMA.
ensg	symbol	chr	start	end	strand	type	entrezID	HUGO	pLI	ncRVIS	posMapSNPs	posMapMaxCADD	eqtlMapSNPs	eqtlMapminP	eqtlMapminQ	eqtlMapts	eqtlDirection	ciMap	ciMapts	minGwasP	IndSigSNPs	GenomicLocus
ENSG00000091010	POU4F3	5	145718587	145720083	1	protein_coding	5459	POU4F3	0.721115	-0.496439	0	0	0	NA	NA	NA	NA	Yes	Mesenchymal_Stem_Cell:hESC	NA	rs564080066	1
ENSG00000173250	GPR151	5	145892666	145895753	-1	protein_coding	134391	GPR151	1.05613e-05	-0.814318	0	0	0	NA	NA	NA	NA	Yes	IMR90:Mesenchymal_Stem_Cell	NA	rs564080066	1
ENSG00000156475	PPP2R2B	5	145967936	146464347	-1	protein_coding	5521	PPP2R2B	0.900683	-0.121298	0	0	0	NA	NA	NA	NA	Yes	IMR90	NA	rs564080066	1
ENSG00000169302	STK32A	5	146614526	146767415	1	protein_coding	202374	STK32A	5.7245e-05	0.777019	0	0	0	NA	NA	NA	NA	Yes	IMR90	NA	rs564080066	1
ENSG00000113657	DPYSL3	5	146770374	146889619	-1	protein_coding	1809	DPYSL3	0.996483	-1.34331	0	0	0	NA	NA	NA	NA	Yes	IMR90:Mesenchymal_Stem_Cell:Mesendoderm:Trophoblast-like_Cell	NA	rs564080066	1
ENSG00000176049	JAKMIP2	5	146967990	147162338	-1	protein_coding	9832	JAKMIP2	0.999937	0.366767	2	11.64	0	NA	NA	NA	NA	Yes	Left_Ventricle:Liver:IMR90:Mesenchymal_Stem_Cell:Mesendoderm:Trophoblast-like_Cell:hESC	NA	rs564080066	1
ENSG00000164266	SPINK1	5	147204131	147211349	-1	protein_coding	6690	SPINK1	0.293111	0.547167	0	0	0	NA	NA	NA	NA	Yes	Aorta:Left_Ventricle:IMR90:Mesenchymal_Stem_Cell:Mesendoderm:Trophoblast-like_Cell:hESC	4.294e-08	rs564080066	1
ENSG00000164265	SCGB3A2	5	147250245	147261754	1	protein_coding	117156	SCGB3A2	0.0424275	-0.0592841	1	3.997	0	NA	NA	NA	NA	Yes	Aorta:Left_Ventricle:IMR90:Mesenchymal_Stem_Cell:Mesendoderm:Trophoblast-like_Cell:hESC	4.294e-08	rs564080066	1
ENSG00000178776	C5orf46	5	147260289	147286101	-1	protein_coding	389336	C5orf46	0.299425	-0.0631851	1	3.997	0	NA	NA	NA	NA	Yes	Mesenchymal_Stem_Cell:Mesendoderm:Trophoblast-like_Cell:hESC	4.294e-08	rs564080066	1
ENSG00000133710	SPINK5	5	147405246	147516852	1	protein_coding	11005	SPINK5	2.11659e-17	0.940026	0	0	0	NA	NA	NA	NA	Yes	Left_Ventricle:IMR90:Mesenchymal_Stem_Cell:Mesendoderm:Trophoblast-like_Cell:hESC	4.294e-08	rs564080066	1
ENSG00000196800	SPINK14	5	147549296	147554961	1	protein_coding	408187	SPINK14	0.0163522	0.11931	0	0	0	NA	NA	NA	NA	Yes	Left_Ventricle:Liver:IMR90:Mesenchymal_Stem_Cell:Mesendoderm:Trophoblast-like_Cell:hESC	4.294e-08	rs564080066	1
ENSG00000178172	SPINK6	5	147582357	147594700	1	protein_coding	404203	SPINK6	2.41646e-05	0.503491	0	0	0	NA	NA	NA	NA	Yes	Aorta:Left_Ventricle:Liver:IMR90:Mesenchymal_Stem_Cell:Mesendoderm:Neural_Progenitor_Cell:Trophoblast-like_Cell:hESC	4.294e-08	rs564080066	1
ENSG00000214510	SPINK13	5	147647743	147665817	1	protein_coding	153218	SPINK13	0.024357	1.16086	1	12.18	0	NA	NA	NA	NA	Yes	Left_Ventricle:Liver:IMR90:Mesenchymal_Stem_Cell:Mesendoderm:Trophoblast-like_Cell:hESC	4.294e-08	rs564080066	1
ENSG00000204909	SPINK9	5	147700766	147719412	1	protein_coding	643394	SPINK9	0.326828	-0.235234	1	2.983	0	NA	NA	NA	NA	No	NA	NA	rs564080066	1
ENSG00000145868	FBXO38	5	147763498	147822399	1	protein_coding	81545	FBXO38	0.999962	0.0541128	0	0	0	NA	NA	NA	NA	Yes	Left_Ventricle:IMR90:Mesenchymal_Stem_Cell:Mesendoderm:Neural_Progenitor_Cell:Trophoblast-like_Cell:hESC	4.294e-08	rs564080066	1
ENSG00000164270	HTR4	5	147830595	148056798	-1	protein_coding	3360	HTR4	0.648788	-0.752171	2	3.382	0	NA	NA	NA	NA	Yes	Aorta:Left_Ventricle:Spleen:IMR90:Mesenchymal_Stem_Cell:Mesendoderm:Trophoblast-like_Cell:hESC	4.294e-08	rs564080066	1
ENSG00000169252	ADRB2	5	148206156	148208196	1	protein_coding	154	ADRB2	0.476493	0.326414	0	0	0	NA	NA	NA	NA	Yes	Left_Ventricle:Liver:Lung:Psoas:IMR90:Mesenchymal_Stem_Cell:Mesendoderm:Trophoblast-like_Cell:hESC	NA	rs564080066	1
ENSG00000169247	SH3TC2	5	148303202	148442726	-1	protein_coding	79628	SH3TC2	1.7329e-12	-0.25319	1	2.308	0	NA	NA	NA	NA	Yes	Left_Ventricle:Liver:GM12878:IMR90:Mesenchymal_Stem_Cell:Mesendoderm:Neural_Progenitor_Cell:Trophoblast-like_Cell:hESC	4.294e-08	rs564080066	1
ENSG00000173210	ABLIM3	5	148521046	148640105	1	protein_coding	22885	ABLIM3	0.0160253	-0.596093	0	0	0	NA	NA	NA	NA	Yes	IMR90:Mesenchymal_Stem_Cell:Mesendoderm:Trophoblast-like_Cell	NA	rs564080066	1
ENSG00000157510	AFAP1L1	5	148651434	148721365	1	protein_coding	134265	AFAP1L1	4.06878e-08	-0.40314	0	0	0	NA	NA	NA	NA	Yes	Left_Ventricle:Liver:Spleen:IMR90:Mesenchymal_Stem_Cell:Mesendoderm:Trophoblast-like_Cell:hESC	4.294e-08	rs564080066	1
ENSG00000164284	GRPEL2	5	148724993	148734146	1	protein_coding	134266	GRPEL2	0.00575467	-1.14727	0	0	0	NA	NA	NA	NA	Yes	Left_Ventricle:IMR90:Mesenchymal_Stem_Cell:Mesendoderm:Trophoblast-like_Cell:hESC	NA	rs564080066	1
ENSG00000145882	PCYOX1L	5	148737570	148749216	1	protein_coding	78991	PCYOX1L	1.26712e-05	0.758236	0	0	0	NA	NA	NA	NA	Yes	Left_Ventricle:IMR90:Mesenchymal_Stem_Cell:Mesendoderm:Trophoblast-like_Cell:hESC	NA	rs564080066	1
ENSG00000127743	IL17B	5	148750887	148783765	-1	protein_coding	27190	IL17B	0.00207428	0.115089	0	0	0	NA	NA	NA	NA	Yes	IMR90	NA	rs564080066	1
ENSG00000113712	CSNK1A1	5	148871760	148931007	-1	protein_coding	1452	CSNK1A1	0.993657	-0.260285	1	0.075	0	NA	NA	NA	NA	Yes	Left_Ventricle:IMR90:Mesenchymal_Stem_Cell:Mesendoderm:Trophoblast-like_Cell:hESC	NA	rs564080066	1
ENSG00000183111	ARHGEF37	5	148931510	149014531	1	protein_coding	389337	ARHGEF37	1.0824e-13	-0.615363	0	0	0	NA	NA	NA	NA	Yes	Left_Ventricle:IMR90:Mesenchymal_Stem_Cell:Mesendoderm:Trophoblast-like_Cell:hESC	NA	rs564080066	1
ENSG00000113722	CDX1	5	149546358	149564120	1	protein_coding	1044	CDX1	0.702597	-0.0578903	0	0	0	NA	NA	NA	NA	Yes	Promoter_anchored_loops	NA	rs564080066	1
ENSG00000113140	SPARC	5	151040657	151066726	-1	protein_coding	6678	SPARC	0.886494	0.0856778	0	0	0	NA	NA	NA	NA	Yes	IMR90	NA	rs564080066	1
ENSG00000177556	ATOX1	5	151121877	151152093	-1	protein_coding	475	ATOX1	0.177402	-0.489553	0	0	0	NA	NA	NA	NA	Yes	IMR90	NA	rs564080066	1
ENSG00000145907	G3BP1	5	151150606	151192346	1	protein_coding	10146	G3BP1	0.988391	-0.294066	0	0	0	NA	NA	NA	NA	Yes	IMR90	NA	rs564080066	1
ENSG00000104228	TRIM35	8	27142404	27168836	-1	protein_coding	23087	TRIM35	0.000940308	-0.967121	0	0	0	NA	NA	NA	NA	Yes	Fetal_Cortex:Left_Ventricle:Liver:Spleen:GM12878:IMR90:Mesenchymal_Stem_Cell:Mesendoderm:Trophoblast-like_Cell:hESC	7.615e-09	rs7982	2
ENSG00000120899	PTK2B	8	27168999	27316903	1	protein_coding	2185	PTK2B	0.984521	-0.296269	0	0	0	NA	NA	NA	NA	Yes	Fetal_Cortex:Left_Ventricle:Liver:Spleen:GM12878:IMR90:Mesenchymal_Stem_Cell:Mesendoderm:Trophoblast-like_Cell:hESC	7.615e-09	rs7982	2
ENSG00000120903	CHRNA2	8	27317279	27337400	-1	protein_coding	1135	CHRNA2	0.00176648	2.5642	0	0	0	NA	NA	NA	NA	Yes	Promoter_anchored_loops:Fetal_Cortex:Mesenchymal_Stem_Cell:Mesendoderm:hESC	7.615e-09	rs7982	2
ENSG00000120915	EPHX2	8	27348296	27403081	1	protein_coding	2053	EPHX2	4.92249e-13	1.72964	0	0	0	NA	NA	NA	NA	Yes	Promoter_anchored_loops:Mesenchymal_Stem_Cell:Mesendoderm:hESC	7.615e-09	rs7982	2
ENSG00000120885	CLU	8	27454434	27472548	-1	protein_coding	1191	CLU	NA	0.0733593	11	8.441	11	6.46089e-11	3.36607e-07	GTEx/v8/Adipose_Subcutaneous:GTEx/v8/Heart_Atrial_Appendage:GTEx/v8/Heart_Left_Ventricle:GTEx/v8/Muscle_Skeletal:GTEx/v8/Skin_Not_Sun_Exposed_Suprapubic:GTEx/v8/Skin_Sun_Exposed_Lower_leg	+	No	NA	7.615e-09	rs7982	2
ENSG00000168077	SCARA3	8	27491385	27534293	1	protein_coding	51435	SCARA3	1.62407e-07	1.37033	0	0	2	5.31825e-05	0.00484085	PsychENCODE_eQTLs	-	No	NA	1.549e-08	rs7982	2
ENSG00000147419	CCDC25	8	27590835	27630170	-1	protein_coding	55246	CCDC25	0.051834	0.653982	0	0	4	1.5678e-06	0.00467199	eQTLGen_cis_eQTLs	-	Yes	EP_links_oneway:Promoter_anchored_loops:Adult_Cortex:IMR90:Mesenchymal_Stem_Cell:Mesendoderm:Trophoblast-like_Cell:hESC	7.615e-09	rs7982	2
ENSG00000171320	ESCO2	8	27629466	27670157	1	protein_coding	157570	ESCO2	0.178964	0.412854	0	0	0	NA	NA	NA	NA	Yes	EP_links_oneway:Promoter_anchored_loops:Adult_Cortex:IMR90:Mesenchymal_Stem_Cell:Mesendoderm:Trophoblast-like_Cell:hESC	7.615e-09	rs7982	2
ENSG00000168078	PBK	8	27667137	27695612	-1	protein_coding	55872	PBK	4.09216e-05	-0.528856	0	0	0	NA	NA	NA	NA	Yes	IMR90	7.615e-09	rs7982	2
ENSG00000189233	NUGGC	8	27879481	27941388	-1	protein_coding	389643	NUGGC	1.95613e-07	0.500533	0	0	0	NA	NA	NA	NA	Yes	Adult_Cortex	7.615e-09	rs7982	2
ENSG00000134014	ELP3	8	27947190	28048673	1	protein_coding	55140	ELP3	3.92611e-07	-0.149156	0	0	0	NA	NA	NA	NA	Yes	Adult_Cortex	7.615e-09	rs7982	2
ENSG00000168081	PNOC	8	28174503	28200872	1	protein_coding	5368	PNOC	0.151495	-0.0220423	0	0	0	NA	NA	NA	NA	Yes	Adult_Cortex	7.615e-09	rs7982	2
ENSG00000167378	IRGQ	19	44088521	44100287	-1	protein_coding	126298	IRGQ	0.00119723	-1.83646	0	0	0	NA	NA	NA	NA	Yes	Fetal_Cortex	2.803e-05	rs12609102;rs76726728:rs5167	3
ENSG00000124444	ZNF576	19	44100544	44105309	1	protein_coding	79177	ZNF576	0.00754575	-1.08557	0	0	0	NA	NA	NA	NA	Yes	Fetal_Cortex	2.803e-05	rs12609102;rs76726728:rs5167	3
ENSG00000226763	SRRM5	19	44100769	44118649	1	protein_coding	100170229	SRRM5	7.19142e-06	-0.661941	0	0	0	NA	NA	NA	NA	Yes	Fetal_Cortex	2.803e-05	rs12609102;rs76726728:rs5167	3
ENSG00000131116	ZNF428	19	44111371	44124026	-1	protein_coding	126299	ZNF428	0.720275	-0.650154	0	0	0	NA	NA	NA	NA	Yes	IMR90	3.683e-13	rs5167:rs12609102;rs76726728	3
ENSG00000105767	CADM4	19	44126520	44143991	-1	protein_coding	199731	CADM4	0.979492	NA	0	0	0	NA	NA	NA	NA	Yes	IMR90	3.683e-13	rs5167:rs12609102;rs76726728	3
ENSG00000104783	KCNN4	19	44270685	44285409	-1	protein_coding	3783	KCNN4	8.36466e-06	-0.0567512	0	0	1	1.3355e-06	0.00406296	eQTLGen_cis_eQTLs	NA	No	NA	NA	rs12609102	3
ENSG00000159871	LYPD5	19	44300081	44331358	-1	protein_coding	284348	LYPD5	9.44505e-05	1.75597	0	0	0	NA	NA	NA	NA	Yes	IMR90	3.355e-37	rs12609102:rs28399637:rs28399664:rs10407439:rs4803764:rs41289512;rs28399664:rs28615360:rs148601586:rs41289512:rs2972558:rs2927468:rs183610051	3
ENSG00000167637	ZNF283	19	44331444	44353307	1	protein_coding	284349	ZNF283	4.46247e-08	1.25985	0	0	0	NA	NA	NA	NA	Yes	IMR90	3.355e-37	rs12609102:rs28399637:rs28399664:rs10407439:rs4803764:rs41289512;rs28399664:rs28615360:rs148601586:rs41289512:rs2972558:rs2927468:rs183610051	3
ENSG00000176222	ZNF404	19	44376515	44405537	-1	protein_coding	342908	ZNF404	1.48959e-05	0.204291	0	0	1	6.74753e-05	0.00596824	PsychENCODE_eQTLs	-	Yes	IMR90	1.468e-11	rs2972558;rs1661184	3
ENSG00000124459	ZNF45	19	44416781	44439430	-1	protein_coding	7596	ZNF45	0.000102512	0.29907	0	0	0	NA	NA	NA	NA	Yes	IMR90	1.93e-08	rs1661184	3
ENSG00000159905	ZNF221	19	44455375	44471861	1	protein_coding	7638	ZNF221	2.58051e-09	-0.128374	0	0	0	NA	NA	NA	NA	Yes	IMR90:Mesenchymal_Stem_Cell:Mesendoderm:hESC	1.93e-08	rs1661184:rs12609102	3
ENSG00000204920	ZNF155	19	44472014	44502477	1	protein_coding	7711	ZNF155	1.33953e-09	0.435176	0	0	1	7.4503e-06	0.0212331	eQTLGen_cis_eQTLs	-	Yes	IMR90:Mesenchymal_Stem_Cell:Mesendoderm:hESC	1.93e-08	rs1661184;rs1661184:rs12609102	3
ENSG00000159882	ZNF230	19	44507100	44518078	1	protein_coding	7773	ZNF230	0.00834108	1.8805	0	0	0	NA	NA	NA	NA	Yes	IMR90:Mesenchymal_Stem_Cell	3.355e-37	rs1661184:rs28399637:rs28399664:rs10407439:rs4803764:rs41289512;rs28399664:rs28615360:rs148601586:rs41289512:rs2972558:rs2927468:rs183610051	3
ENSG00000159885	ZNF222	19	44529494	44537265	1	protein_coding	7673	ZNF222	9.20501e-11	0.148042	0	0	0	NA	NA	NA	NA	Yes	IMR90	1.93e-08	rs1661184	3
ENSG00000267022	ZNF223	19	44529506	44591471	1	protein_coding	7766	NA	NA	0.204655	0	0	0	NA	NA	NA	NA	Yes	IMR90	1.93e-08	rs1661184	3
ENSG00000178386	ZNF223	19	44555520	44572144	1	protein_coding	7766	ZNF223	5.14225e-09	0.204655	0	0	0	NA	NA	NA	NA	Yes	IMR90	1.93e-08	rs1661184	3
ENSG00000267680	ZNF224	19	44598492	44612479	1	protein_coding	7767	ZNF224	2.07446e-09	-0.281088	0	0	6	1.6075e-07	0.000537803	eQTLGen_cis_eQTLs	+	No	NA	1.101e-13	rs12609102;rs76726728	3
ENSG00000256294	ZNF225	19	44616334	44637027	1	protein_coding	7768	ZNF225	3.36669e-08	0.547354	0	0	0	NA	NA	NA	NA	Yes	IMR90	3.32e-199	rs1661184:rs12609102:rs28399637:rs28399664:rs10407439:rs4803764:rs41289512;rs28399664:rs28615360:rs148601586:rs41289512:rs2972558:rs2927468:rs183610051:rs365653:rs138607350:rs6859:rs41290120:rs79701229:rs144261139:rs7259620:rs11556505:rs1081105:rs157582:rs429358;rs11556505;rs157582:rs1081106:rs11556505;rs157582:rs157580:rs429358;rs157582:rs11668327:rs405697:rs10119:rs449647:rs429358;rs75627662:rs…	3
ENSG00000263002	ZNF234	19	44645710	44663156	1	protein_coding	10780	ZNF234	1.07737e-13	-0.0209373	0	0	1	4.4537e-06	0.0128017	eQTLGen_cis_eQTLs	NA	Yes	IMR90:Mesenchymal_Stem_Cell	1.93e-08	rs12609102;rs1661184	3
ENSG00000167380	ZNF226	19	44669226	44682534	1	protein_coding	7769	ZNF226	5.26919e-15	-0.0506554	0	0	1	NA	0.049	CMC_SVA_cis	-	Yes	IMR90:Mesenchymal_Stem_Cell	1.468e-11	rs2972558;rs1661184	3
ENSG00000131115	ZNF227	19	44711700	44741421	1	protein_coding	7770	ZNF227	1.6916e-05	0.35023	0	0	0	NA	NA	NA	NA	Yes	IMR90:Mesenchymal_Stem_Cell	1.93e-08	rs1661184	3
ENSG00000159917	ZNF235	19	44732882	44809199	-1	protein_coding	9310	ZNF235	1.8582e-10	-0.818454	0	0	0	NA	NA	NA	NA	Yes	IMR90:Mesenchymal_Stem_Cell	1.93e-08	rs12609102:rs1661184	3
ENSG00000159915	ZNF233	19	44754318	44779470	1	protein_coding	353355	ZNF233	3.27016e-17	-0.0669614	0	0	0	NA	NA	NA	NA	Yes	IMR90:Mesenchymal_Stem_Cell:Mesendoderm	3.355e-37	rs1661184:rs28399637:rs28399664:rs10407439:rs4803764:rs41289512;rs28399664:rs28615360:rs148601586:rs41289512:rs2972558:rs2927468:rs183610051	3
ENSG00000062370	ZNF112	19	44830708	44871377	-1	protein_coding	7771	ZNF112	0.154211	0.0382373	0	0	3	1.03653e-05	0.0423715	GTEx/v8/Brain_Anterior_cingulate_cortex_BA24	+	Yes	IMR90:Mesenchymal_Stem_Cell:Mesendoderm:hESC	3.355e-37	rs3925681;rs59325138;rs71352239;rs1661184:rs12609102:rs28399637:rs28399664:rs10407439:rs4803764:rs41289512;rs28399664:rs28615360:rs148601586:rs41289512:rs2972558:rs2927468:rs183610051	3
ENSG00000267508	ZNF285	19	44886459	44905774	-1	protein_coding	646915	ZNF285	0.00240306	0.299255	0	0	3	0.000104088	0.00872246	PsychENCODE_eQTLs	+	No	NA	1.538e-27	rs7259620	3
ENSG00000167383	ZNF229	19	44921685	44952766	-1	protein_coding	7772	ZNF229	6.30663e-09	2.83642	0	0	2	NA	0.049	CMC_SVA_cis	-	No	NA	1.93e-08	rs1661184	3
ENSG00000216588	IGSF23	19	45116940	45140081	1	protein_coding	147710	IGSF23	NA	0.573725	0	0	0	NA	NA	NA	NA	Yes	IMR90:Mesenchymal_Stem_Cell	3.355e-37	rs12609102:rs5167:rs12609102;rs76726728:rs28399637:rs28399664:rs10407439:rs4803764:rs41289512;rs28399664:rs28615360:rs148601586:rs41289512:rs2972558:rs2927468:rs183610051	3
ENSG00000073008	PVR	19	45147098	45166850	1	protein_coding	5817	PVR	5.51101e-07	-0.732917	0	0	2	8.23982e-07	0.000737657	BIOSQTL/BIOS_eQTL_geneLevel	-	Yes	IMR90:Mesenchymal_Stem_Cell	3.32e-199	rs1661184;rs12609102:rs28399637:rs28399664:rs10407439:rs4803764:rs41289512;rs28399664:rs28615360:rs148601586:rs41289512:rs2972558:rs2927468:rs183610051:rs5167:rs12609102;rs76726728:rs1081105:rs7259620:rs405697:rs10119:rs449647:rs157580:rs429358;rs11556505;rs75627662:rs7259620;rs59325138:rs429358:rs7412:rs1081106:rs75627662:rs484195:rs429358;rs75627662:rs59325138:rs3925681:rs157592:rs59325138;rs39…	3
ENSG00000186567	CEACAM19	19	45165545	45187631	1	protein_coding	56971	CEACAM19	5.77651e-07	0.414158	0	0	24	8.23982e-07	5.12446e-17	BIOSQTL/BIOS_eQTL_geneLevel:GTEx/v8/Heart_Left_Ventricle	+	Yes	IMR90:Mesenchymal_Stem_Cell	3.355e-37	rs1661184;rs28399637;rs4803764;rs1081106;rs28399637:rs28399664:rs10407439:rs4803764:rs41289512;rs28399664:rs28615360:rs148601586:rs41289512:rs2972558:rs2927468:rs183610051:rs12609102:rs5167:rs12609102;rs76726728	3
ENSG00000213892	CEACAM16	19	45202421	45213986	1	protein_coding	388551	CEACAM16	0.0295803	-0.58664	0	0	0	NA	NA	NA	NA	Yes	Promoter_anchored_loops:Spleen:IMR90:Mesenchymal_Stem_Cell	3.355e-37	rs117034857:rs80168591:rs139997344:rs12609102:rs41290120:rs28399637:rs28399664:rs10407439:rs4803764:rs41289512;rs28399664:rs28615360:rs148601586:rs41289512:rs2972558:rs2927468:rs183610051:rs5167:rs12609102;rs76726728	3
ENSG00000069399	BCL3	19	45250962	45263301	1	protein_coding	102465879	BCL3	0.862173	NA	0	0	1	1.3701e-05	0.0383199	eQTLGen_cis_eQTLs	-	No	NA	6.986e-10	rs365653	3
ENSG00000142273	CBLC	19	45281126	45303891	1	protein_coding	23624	CBLC	0.00018299	-0.348046	3	11.23	0	NA	NA	NA	NA	Yes	Left_Ventricle:Spleen:IMR90:Mesenchymal_Stem_Cell	3.355e-37	rs80168591;rs139997344;rs12609102;rs28399637:rs28399664:rs10407439:rs4803764:rs41289512;rs28399664:rs28615360:rs148601586:rs41289512:rs2972558:rs2927468:rs183610051:rs12609102	3
ENSG00000187244	BCAM	19	45312328	45324673	1	protein_coding	4059	BCAM	0.0368512	NA	8	11.23	32	4.84289e-11	1.51549e-19	GTEx/v8/Artery_Tibial:GTEx/v8/Colon_Sigmoid:GTEx/v8/Lung:GTEx/v8/Nerve_Tibial	-	Yes	Left_Ventricle:Spleen:IMR90:Mesenchymal_Stem_Cell	2.66e-119	rs12609102;rs139997344;rs41290120;rs28399637;rs28399664;rs10407439;rs4803764;rs2972558;rs11556505;rs429358;rs157582;rs28399637:rs28399664:rs10407439:rs4803764:rs41289512;rs28399664:rs28615360:rs148601586:rs41289512:rs2972558:rs2927468:rs183610051:rs12609102	3
ENSG00000130202	PVRL2	19	45349432	45392485	1	protein_coding	5819	PVRL2	0.531937	-0.314456	87	21.1	135	3.27170000000001e-310	0	eQTLcatalogue/Lepik_2017_ge_blood:eQTLcatalogue/TwinsUK_ge_blood:PsychENCODE_eQTLs:eQTLGen_cis_eQTLs:BIOSQTL/BIOS_eQTL_geneLevel:CMC_SVA_cis:GTEx/v8/Whole_Blood:GTEx/v8/Artery_Aorta:GTEx/v8/Artery_Coronary:GTEx/v8/Artery_Tibial:GTEx/v8/Colon_Transverse:GTEx/v8/Esophagus_Mucosa:GTEx/v8/Esophagus_Muscularis:GTEx/v8/Heart_Left_Ventricle:GTEx/v8/Liver:GTEx/v8/Muscle_Skeletal:GTEx/v8/Pancreas:GTEx/v8/…	+	Yes	Fetal_Cortex:Left_Ventricle:IMR90:Mesenchymal_Stem_Cell	7.49e-161	rs10407439;rs4803764;rs28615360;rs148601586;rs41289512;rs2972558;rs2927468;rs183610051;rs365653;rs138607350;rs12609102;rs6859;rs41290120;rs79701229;rs144261139;rs7259620;rs11556505;rs1081105;rs157582;rs429358;rs1081106;rs157580;rs11668327;rs405697;rs10119;rs449647;rs75627662;rs484195;rs7254133;rs28399637;rs28399664;rs7412;rs3925681;rs157592;rs59325138;rs71352239;rs365653:rs138607350:rs41289512:rs…	3
ENSG00000130204	TOMM40	19	45393826	45406946	1	protein_coding	10452	TOMM40	0.963682	NA	75	25.1	44	1.05959e-27	0	eQTLGen_cis_eQTLs:BIOSQTL/BIOS_eQTL_geneLevel:xQTLServer_eQTLs:CMC_SVA_cis:GTEx/v8/Muscle_Skeletal:GTEx/v8/Nerve_Tibial:GTEx/v8/Skin_Not_Sun_Exposed_Suprapubic:GTEx/v8/Skin_Sun_Exposed_Lower_leg	+	Yes	Adult_Cortex:Fetal_Cortex:IMR90:Mesenchymal_Stem_Cell	3.32e-199	rs79701229;rs12609102;rs144261139;rs7259620;rs11556505;rs1081105;rs157582;rs429358;rs1081106;rs157580;rs11668327;rs405697;rs10119;rs449647;rs75627662;rs59325138;rs7412;rs484195;rs71352239;rs365653;rs3925681;rs3925681:rs1081105:rs157592:rs59325138;rs71352239:rs484195:rs429358;rs157592:rs7412:rs71352239:rs60049679:rs12609102;rs76726728:rs5167	3
ENSG00000130203	APOE	19	45409011	45412650	1	protein_coding	348	APOE	0.0345336	-0.237445	51	25.1	81	4.15701e-26	1.08874e-31	GTEx/v8/Esophagus_Mucosa:GTEx/v8/Heart_Atrial_Appendage:GTEx/v8/Lung:GTEx/v8/Pancreas:GTEx/v8/Prostate:GTEx/v8/Skin_Not_Sun_Exposed_Suprapubic:GTEx/v8/Skin_Sun_Exposed_Lower_leg:GTEx/v8/Testis	+	Yes	Left_Ventricle:Liver:GM12878:IMR90:Mesenchymal_Stem_Cell:Mesendoderm:Trophoblast-like_Cell:hESC	3.32e-199	rs1081105;rs7259620;rs405697;rs10119;rs449647;rs157580;rs429358;rs11556505;rs75627662;rs59325138;rs7412;rs1081106;rs484195;rs41289512;rs3925681;rs157592;rs71352239;rs5167;rs157582;rs5167:rs12609102;rs76726728	3
ENSG00000130208	APOC1	19	45417504	45422606	1	protein_coding	341	APOC1	0.0507383	-0.105569	47	25.1	98	2.93412e-14	3.88851e-20	PsychENCODE_eQTLs:CMC_SVA_cis:GTEx/v8/Adipose_Visceral_Omentum:GTEx/v8/Adrenal_Gland:GTEx/v8/Brain_Nucleus_accumbens_basal_ganglia:GTEx/v8/Esophagus_Mucosa:GTEx/v8/Heart_Atrial_Appendage:GTEx/v8/Lung:GTEx/v8/Skin_Not_Sun_Exposed_Suprapubic:GTEx/v8/Skin_Sun_Exposed_Lower_leg:GTEx/v8/Testis	-	Yes	Adult_Cortex:Fetal_Cortex:Left_Ventricle:Liver:GM12878:IMR90:Mesenchymal_Stem_Cell:Mesendoderm:Trophoblast-like_Cell:hESC	3.32e-199	rs7259620;rs449647;rs157580;rs429358;rs11556505;rs75627662;rs59325138;rs7412;rs1081105;rs1081106;rs484195;rs41289512;rs3925681;rs157592;rs71352239;rs60049679;rs5167;rs157582;rs405697;rs7254133:rs12609102;rs76726728:rs5167	3
ENSG00000224916	APOC4-APOC2	19	45445495	45452822	1	protein_coding	346	APOC4-APOC2	NA	NA	25	17.4	50	7.93612e-10	5.97872e-06	PsychENCODE_eQTLs:BIOSQTL/BIOS_eQTL_geneLevel	+	Yes	Left_Ventricle:Liver:GM12878:IMR90:Mesenchymal_Stem_Cell:Mesendoderm:Trophoblast-like_Cell:hESC	3.32e-199	rs7254133;rs5167;rs12609102;rs76726728;rs1081105:rs7259620:rs405697:rs10119:rs449647:rs157580:rs429358;rs11556505;rs75627662:rs7259620;rs59325138:rs429358:rs7412:rs1081106:rs75627662:rs484195:rs429358;rs75627662:rs59325138:rs41289512:rs3925681:rs157592:rs59325138;rs3925681;rs71352239:rs429358;rs157592:rs71352239:rs60049679:rs7254133:rs193187396;rs187270432:rs193187396:rs12609102:rs365653:rs138607…	3
ENSG00000267467	APOC4	19	45445495	45452820	1	protein_coding	346	APOC4	0.000150692	0.337274	25	17.4	55	4.4607e-14	3.56734e-09	BIOSQTL/BIOS_eQTL_geneLevel:BRAINEAC/PUTM:GTEx/v8/Brain_Hippocampus:GTEx/v8/Liver:GTEx/v8/Lung:GTEx/v8/Small_Intestine_Terminal_Ileum	+	Yes	Left_Ventricle:Liver:GM12878:IMR90:Mesenchymal_Stem_Cell:Mesendoderm:Trophoblast-like_Cell:hESC	3.32e-199	rs7254133;rs5167;rs12609102;rs76726728;rs1081105:rs7259620:rs405697:rs10119:rs449647:rs157580:rs429358;rs11556505;rs75627662:rs7259620;rs59325138:rs429358:rs7412:rs1081106:rs75627662:rs484195:rs429358;rs75627662:rs59325138:rs41289512:rs3925681:rs157592:rs59325138;rs3925681;rs71352239:rs429358;rs157592:rs71352239:rs60049679:rs7254133:rs193187396;rs187270432:rs193187396:rs12609102:rs365653:rs138607…	3
ENSG00000234906	APOC2	19	45449243	45452822	1	protein_coding	344	APOC2	0.0227961	0.388733	24	17.4	54	4.95682e-22	1.72716e-44	PsychENCODE_eQTLs:BRAINEAC/PUTM:GTEx/v8/Adipose_Subcutaneous:GTEx/v8/Adrenal_Gland:GTEx/v8/Brain_Caudate_basal_ganglia:GTEx/v8/Brain_Cerebellum:GTEx/v8/Brain_Cortex:GTEx/v8/Brain_Frontal_Cortex_BA9:GTEx/v8/Brain_Nucleus_accumbens_basal_ganglia:GTEx/v8/Brain_Putamen_basal_ganglia:GTEx/v8/Colon_Sigmoid:GTEx/v8/Esophagus_Gastroesophageal_Junction:GTEx/v8/Esophagus_Mucosa:GTEx/v8/Esophagus_Muscularis…	+	Yes	Left_Ventricle:Liver:GM12878:IMR90:Mesenchymal_Stem_Cell:Mesendoderm:Trophoblast-like_Cell:hESC	3.32e-199	rs5167;rs12609102;rs76726728;rs1081105:rs7259620:rs405697:rs10119:rs449647:rs157580:rs429358;rs11556505;rs75627662:rs7259620;rs59325138:rs429358:rs7412:rs1081106:rs75627662:rs484195:rs429358;rs75627662:rs59325138:rs41289512:rs3925681:rs157592:rs59325138;rs3925681;rs71352239:rs429358;rs157592:rs71352239:rs60049679:rs7254133:rs193187396;rs187270432:rs193187396:rs12609102:rs365653:rs138607350:rs6859…	3
ENSG00000267114	CTB-129P6.11	19	45453301	45457264	-1	protein_coding	NA	NA	NA	NA	18	17.4	0	NA	NA	NA	NA	Yes	Promoter_anchored_loops:Adult_Cortex:Fetal_Cortex:Left_Ventricle:Liver:GM12878:IMR90:Mesenchymal_Stem_Cell:Mesendoderm:Trophoblast-like_Cell:hESC	3.32e-199	rs5167;rs12609102;rs76726728;rs76726728:rs365653:rs138607350:rs41289512:rs157582:rs429358;rs11556505;rs157582:rs12609102:rs144261139:rs1081106:rs11556505;rs157582:rs157580:rs7259620:rs11556505:rs429358;rs157582:rs1081105:rs11668327:rs429358;rs75627662:rs7259620;rs59325138:rs429358:rs7412:rs75627662:rs484195:rs429358;rs75627662:rs59325138:rs3925681:rs157592:rs59325138;rs3925681;rs71352239:rs429358…	3
ENSG00000104853	CLPTM1	19	45457842	45496599	1	protein_coding	1209	CLPTM1	0.980483	NA	45	17.4	57	1.65186e-39	0	PsychENCODE_eQTLs:eQTLGen_cis_eQTLs:BIOSQTL/BIOS_eQTL_geneLevel:CMC_SVA_cis:GTEx/v8/Adrenal_Gland:GTEx/v8/Skin_Not_Sun_Exposed_Suprapubic:GTEx/v8/Skin_Sun_Exposed_Lower_leg:GTEx/v8/Testis	-	Yes	Promoter_anchored_loops:Adult_Cortex:Fetal_Cortex:Left_Ventricle:Liver:GM12878:IMR90:Mesenchymal_Stem_Cell:Mesendoderm:Trophoblast-like_Cell:hESC	3.32e-199	rs5167;rs12609102;rs76726728;rs76726728:rs365653:rs138607350:rs41289512:rs157582:rs429358;rs11556505;rs157582:rs12609102:rs144261139:rs1081106:rs11556505;rs157582:rs157580:rs7259620:rs11556505:rs429358;rs157582:rs1081105:rs11668327:rs429358;rs75627662:rs7259620;rs59325138:rs429358:rs7412:rs75627662:rs484195:rs429358;rs75627662:rs59325138:rs3925681:rs157592:rs59325138;rs3925681;rs71352239:rs429358…	3
ENSG00000104856	RELB	19	45504688	45541452	1	protein_coding	5971	RELB	0.973563	NA	13	16.15	1	5.45508e-05	0.0424232	GTEx/v8/Cells_Cultured_fibroblasts	-	No	NA	4.182e-10	rs5167;rs187270432;rs28615360	3
ENSG00000104859	CLASRP	19	45542298	45574214	1	protein_coding	11129	CLASRP	0.964966	-0.0852025	3	0.553	0	NA	NA	NA	NA	Yes	Promoter_anchored_loops:Adult_Cortex:Fetal_Cortex:GM12878:IMR90:Mesenchymal_Stem_Cell:Mesendoderm:Trophoblast-like_Cell:hESC	3.32e-199	rs193187396;rs187270432;rs76726728;rs76726728:rs365653:rs138607350:rs41289512:rs157582:rs429358;rs11556505;rs157582:rs12609102:rs144261139:rs1081106:rs11556505;rs157582:rs157580:rs7259620:rs11556505:rs429358;rs157582:rs1081105:rs11668327:rs429358;rs75627662:rs7259620;rs59325138:rs429358:rs7412:rs75627662:rs484195:rs429358;rs75627662:rs59325138:rs3925681:rs157592:rs59325138;rs3925681;rs71352239:rs…	3
ENSG00000170684	ZNF296	19	45574758	45579846	-1	protein_coding	162979	ZNF296	0.973289	NA	0	0	1	1.4763e-05	0.0408997	eQTLGen_cis_eQTLs	+	No	NA	9.285e-05	rs5167	3
ENSG00000142252	GEMIN7	19	45582453	45594782	1	protein_coding	79760	GEMIN7	0.347104	-0.101681	0	0	19	4.32762e-07	1.34126e-48	GTEx/v8/Skin_Not_Sun_Exposed_Suprapubic:GTEx/v8/Thyroid	+	No	NA	3.683e-13	rs5167	3
ENSG00000007047	MARK4	19	45582546	45808541	1	protein_coding	57787	MARK4	0.999932	NA	20	16.13	0	NA	NA	NA	NA	No	NA	5.413e-11	rs76726728;rs183110257;rs117034857	3
ENSG00000104866	PPP1R37	19	45594654	45651335	1	protein_coding	284352	PPP1R37	NA	0.14395	0	0	6	2.18193e-06	0.00169474	BIOSQTL/BIOS_eQTL_geneLevel	-	No	NA	4.353e-21	rs484195	3
ENSG00000179846	NKPD1	19	45653008	45663408	-1	protein_coding	284353	NKPD1	1.88742e-09	NA	1	0.466	0	NA	NA	NA	NA	No	NA	NA	rs76726728	3
ENSG00000007255	TRAPPC6A	19	45666186	45681495	-1	protein_coding	79090	TRAPPC6A	0.000705278	-0.133842	1	0.466	0	NA	NA	NA	NA	Yes	Adult_Cortex:Fetal_Cortex	3.32e-199	rs76726728;rs429358;rs11556505;rs75627662:rs7259620;rs59325138:rs429358:rs7412:rs1081105:rs1081106:rs75627662:rs484195:rs429358;rs75627662:rs59325138:rs41289512:rs3925681:rs157592:rs59325138;rs3925681;rs71352239:rs429358;rs157592:rs71352239:rs60049679:rs12609102;rs76726728:rs5167:rs76726728:rs76726728;rs117034857:rs10407439:rs4803764:rs28615360:rs148601586	3
ENSG00000189114	BLOC1S3	19	45682003	45685059	1	protein_coding	388552	BLOC1S3	0.0184298	-0.115773	0	0	0	NA	NA	NA	NA	Yes	Adult_Cortex:Fetal_Cortex	3.32e-199	rs429358;rs11556505;rs75627662:rs7259620;rs59325138:rs429358:rs7412:rs1081105:rs1081106:rs75627662:rs484195:rs429358;rs75627662:rs59325138:rs41289512:rs3925681:rs157592:rs59325138;rs3925681;rs71352239:rs429358;rs157592:rs71352239:rs60049679:rs12609102;rs76726728:rs5167:rs76726728:rs76726728;rs117034857:rs10407439:rs4803764:rs28615360:rs148601586	3
ENSG00000267545	AC005779.2	19	45683080	45705702	1	protein_coding	NA	NA	NA	NA	10	12.2	0	NA	NA	NA	NA	Yes	Adult_Cortex:Fetal_Cortex	3.32e-199	rs76726728;rs183110257;rs429358;rs11556505;rs75627662:rs7259620;rs59325138:rs429358:rs7412:rs1081105:rs1081106:rs75627662:rs484195:rs429358;rs75627662:rs59325138:rs41289512:rs3925681:rs157592:rs59325138;rs3925681;rs71352239:rs429358;rs157592:rs71352239:rs60049679:rs12609102;rs76726728:rs5167:rs76726728:rs76726728;rs117034857:rs10407439:rs4803764:rs28615360:rs148601586	3
ENSG00000266958	AC006126.3	19	45690646	45720191	1	protein_coding	NA	NA	NA	NA	16	16.13	1	0.000348261	0.0244824	PsychENCODE_eQTLs	-	Yes	Promoter_anchored_loops	5.413e-11	rs76726728;rs183110257;rs365653;rs139997344:rs12609102:rs12609102;rs76726728:rs5167	3
ENSG00000130201	EXOC3L2	19	45715879	45737469	-1	protein_coding	90332	EXOC3L2	0.925564	NA	15	16.13	0	NA	NA	NA	NA	Yes	IMR90:Mesenchymal_Stem_Cell:Mesendoderm:Trophoblast-like_Cell	3.683e-13	rs183110257;rs76726728;rs117034857;rs5167:rs12609102;rs76726728:rs193187396;rs187270432:rs193187396:rs76726728;rs117034857:rs117034857	3
ENSG00000104879	CKM	19	45809672	45826235	-1	protein_coding	1158	CKM	0.00505059	0.0384923	2	12.86	0	NA	NA	NA	NA	Yes	IMR90:Mesenchymal_Stem_Cell:Mesendoderm	3.683e-13	rs76726728;rs117034857;rs5167:rs12609102;rs76726728:rs183110257:rs76726728;rs117034857:rs193187396;rs187270432:rs193187396	3
ENSG00000104892	KLC3	19	45836692	45854778	1	protein_coding	147700	KLC3	3.15849e-06	NA	1	12.86	0	NA	NA	NA	NA	Yes	IMR90:Mesenchymal_Stem_Cell:Mesendoderm	3.683e-13	rs76726728;rs117034857;rs5167:rs12609102;rs76726728:rs183110257:rs76726728;rs117034857:rs193187396;rs187270432:rs193187396	3
ENSG00000268341	L47234.1	19	45842445	45842639	1	protein_coding	NA	NA	NA	NA	0	0	0	NA	NA	NA	NA	Yes	Mesenchymal_Stem_Cell	3.683e-13	rs5167:rs12609102;rs76726728:rs183110257:rs76726728;rs117034857	3
ENSG00000104884	ERCC2	19	45853095	45874176	-1	protein_coding	2068	ERCC2	3.14163e-13	-0.123245	0	0	1	2.01002e-05	0.00162229	GTEx/v8/Spleen	+	Yes	Mesenchymal_Stem_Cell	3.175e-15	rs79701229;rs5167:rs12609102;rs76726728:rs183110257:rs76726728;rs117034857	3
ENSG00000104881	PPP1R13L	19	45882892	45909607	-1	protein_coding	10848	PPP1R13L	0.00265402	-0.293275	1	6.913	0	NA	NA	NA	NA	Yes	GM12878:IMR90:Mesenchymal_Stem_Cell	7.052e-11	rs117034857;rs76726728;rs117034857:rs183110257	3
ENSG00000117877	CD3EAP	19	45909467	45914024	1	protein_coding	10849	CD3EAP	5.68877e-05	1.56855	1	6.913	0	NA	NA	NA	NA	Yes	GM12878:IMR90:Mesenchymal_Stem_Cell	7.052e-11	rs117034857;rs76726728;rs117034857:rs183110257	3
ENSG00000012061	ERCC1	19	45910591	45982086	-1	protein_coding	2067	ERCC1	0.000286883	-0.0110787	4	14.38	6	2.72709e-05	8.93421e-09	GTEx/v8/Adipose_Subcutaneous	+	Yes	GM12878:IMR90	7.414e-11	rs117034857;rs76726728;rs10407439	3
ENSG00000125740	FOSB	19	45971253	45978437	1	protein_coding	2354	FOSB	0.852916	-1.20539	1	1.248	0	NA	NA	NA	NA	Yes	Adult_Cortex:GM12878:IMR90	7.052e-11	rs76726728;rs117034857;rs117034857:rs117034857	3
ENSG00000125744	RTN2	19	45988547	46000319	-1	protein_coding	6253	RTN2	0.63618	NA	0	0	0	NA	NA	NA	NA	Yes	GM12878:IMR90	NA	rs117034857	3
ENSG00000213889	PPM1N	19	45992035	46005768	1	protein_coding	147699	PPM1N	0.000104897	-0.142648	0	0	0	NA	NA	NA	NA	Yes	GM12878:IMR90	NA	rs117034857	3
ENSG00000125753	VASP	19	46009837	46030241	1	protein_coding	7408	VASP	0.583671	-0.335331	0	0	2	4.3483e-06	0.0124706	eQTLGen_cis_eQTLs	-	No	NA	7.414e-11	rs117034857	3
ENSG00000125741	OPA3	19	46030685	46105470	-1	protein_coding	80207	OPA3	0.00412067	-0.0666616	0	0	0	NA	NA	NA	NA	Yes	Adult_Cortex	NA	rs76726728;rs117034857	3
ENSG00000177464	GPR4	19	46093022	46105466	-1	protein_coding	2828	GPR4	0.165986	-0.166011	0	0	0	NA	NA	NA	NA	Yes	Adult_Cortex	NA	rs76726728;rs117034857	3
ENSG00000125746	EML2	19	46110252	46148887	-1	protein_coding	24139	EML2	7.57699e-10	0.190257	0	0	11	NA	0.009	CMC_SVA_cis	+	Yes	Promoter_anchored_loops:Adult_Cortex:Fetal_Cortex	2.299e-25	rs10407439;rs2972558;rs4803764;rs2927468;rs5167:rs76726728;rs117034857	3
ENSG00000267757	C19orf83	19	46144752	46146098	1	protein_coding	100287177	C19orf83	NA	NA	0	0	0	NA	NA	NA	NA	Yes	Promoter_anchored_loops:Adult_Cortex:Fetal_Cortex	7.052e-11	rs5167:rs76726728;rs117034857	3
ENSG00000125743	SNRPD2	19	46190712	46195827	-1	protein_coding	6633	SNRPD2	0.747515	-0.475801	0	0	1	3.92038e-05	0.0181244	GTEx/v8/Muscle_Skeletal	-	Yes	Adult_Cortex:Fetal_Cortex	3.679e-08	rs6859;rs76726728;rs117034857	3
ENSG00000011478	QPCTL	19	46195741	46207247	1	protein_coding	54814	QPCTL	0.00026154	-0.638079	0	0	0	NA	NA	NA	NA	Yes	Adult_Cortex:Fetal_Cortex	NA	rs76726728;rs117034857	3
ENSG00000177051	FBXO46	19	46213887	46234162	-1	protein_coding	23403	FBXO46	0.876437	0.0905437	0	0	0	NA	NA	NA	NA	Yes	Fetal_Cortex:Left_Ventricle:GM12878:IMR90	NA	rs76726728;rs117034857:rs117034857	3
ENSG00000237452	AC074212.3	19	46236509	46267792	1	protein_coding	NA	NA	0.376321	NA	0	0	0	NA	NA	NA	NA	Yes	Fetal_Cortex:Left_Ventricle:GM12878:IMR90	NA	rs76726728;rs117034857:rs117034857	3
ENSG00000177045	SIX5	19	46268043	46272484	-1	protein_coding	147912	SIX5	0.310829	-0.397728	0	0	0	NA	NA	NA	NA	Yes	Fetal_Cortex	NA	rs76726728;rs117034857	3
ENSG00000104936	DMPK	19	46272975	46285810	-1	protein_coding	1760	DMPK	0.0330812	-0.863937	0	0	2	1.25309e-05	0.00192955	PsychENCODE_eQTLs:GTEx/v8/Brain_Substantia_nigra	-	No	NA	2.12e-25	rs1081105;rs41290120	3
ENSG00000104941	RSPH6A	19	46298968	46318577	-1	protein_coding	81492	RSPH6A	2.54884e-08	NA	0	0	0	NA	NA	NA	NA	Yes	Promoter_anchored_loops	1.117e-12	rs7254133	3
ENSG00000188425	NANOS2	19	46416475	46418036	-1	protein_coding	339345	NANOS2	0.575906	0.121128	0	0	0	NA	NA	NA	NA	Yes	Promoter_anchored_loops	NA	rs117034857	3
ENSG00000230510	PPP5D1	19	46984053	47104457	-1	protein_coding	100506012	PPP5D1	0.039345	NA	0	0	0	NA	NA	NA	NA	Yes	Adult_Cortex	NA	rs76726728;rs117034857	3
ENSG00000268423	AC011551.3	19	47050313	47104118	-1	protein_coding	NA	NA	NA	NA	0	0	0	NA	NA	NA	NA	Yes	Adult_Cortex	NA	rs76726728;rs117034857	3
ENSG00000160014	CALM3	19	47104331	47114050	1	protein_coding	808	CALM3	0.580172	NA	0	0	0	NA	NA	NA	NA	Yes	Adult_Cortex	NA	rs76726728;rs117034857	3
ensg : ENSG ID
symbol : Gene Symbol
chr : chromosome
start : Starting position of the gene (GRCh37)
end : Ending position of the gene (GRCh37)
strand : Strand of the gene
type : Gene biotype from Ensembl
entrezID : entrez ID (if available)
HUGO : HUGO (HGNC) gene symbol
pLI : pLI score from ExAC database. The probability of being loss-of-function intolerant. The higher the score is, the more intolerant to loss-of-function mutations the gene is
ncRVIS : Non-coding residual variation intolerance score. The higher the score is, the more intolerant to non-coding variation the gene is
posMapSNPs (posMap) : Number of SNPs mapped to gene based on positional mapping (after functional filtering if parameters are given)
posMapMaxCADD (posMap) : The maximum CADD score of mapped SNPs by positional mapping
eqtlMapSNPs (eqtlMap) : Number of SNPs mapped to the gene based on eQTL mapping
eqtlMapminP (eqtlMap) : The minimum eQTL P-value of mapped SNPs
eqtlMapminQ (eqtlMap) : The minimum eQTL FDR of mapped SNPs
eqtlMapts (eqtlMap) : Tissue types of mapped eQTL SNPs
eqtlDirection (eqtlMap) : Consequential direction of mapped eQTL SNPs after aligning risk increasing alleles in GWAS and tested alleles in eQTL data source, "NA" if risk increase alleles are not defined either because signed effect is not provided in the input GWAS file or all of eQTL SNPs are not in the input GWAS file but included from reference panel for the gene
ciMap (ciMap) : "Yes" if the gene is mapped by chromatin interaction mapping, "No" otherwise
ciMapts (ciMap) : Tissue/cell types of mapped chromatin interactions
minGwasP : The minimum P-value of mapped SNPs
IndSigSNPs : rsID of the independent significant SNPs that are in LD with the mapped SNPs.

## Sheet: Supplementary Table 7
Supplementary Table 7. Genome-wide significant (P<5.00E-08) independent variants in the VD GWAS Stage2
GenomicLocus	uniqID	rsID	chr	pos	p	nSNPs	nGWASSNPs
1	1:116871703:C:T	rs150423973	1	116871703	3.631e-08	4	4
2	1:120072559:A:T	rs55977072	1	120072559	4.492e-08	1	1
3	1:167628193:C:T	rs555863053	1	167628193	2.747e-08	1	1
4	2:7559484:A:C	rs543737714	2	7559484	3.004e-09	1	1
5	2:129694243:A:G	rs571573246	2	129694243	2.998e-09	1	1
6	2:170746289:A:G	rs138654898	2	170746289	1.724e-08	1	1
7	3:9967952:A:G	rs536931879	3	9967952	4.899e-08	1	1
8	4:89592499:G:T	rs79120584	4	89592499	2.448e-09	1	1
8	4:89766794:C:T	rs117164223	4	89766794	9.153e-09	2	2
9	5:20583716:A:C	rs534723021	5	20583716	6.39e-09	1	1
10	5:79616698:A:G	rs200249535	5	79616698	7.551e-11	1	1
11	5:91599460:C:G	rs563370505	5	91599460	1.527e-08	1	1
12	5:148037600:A:G	rs564080066	5	148037600	2.321e-08	1	1
13	6:75160301:G:T	rs202007547	6	75160301	4.77e-08	1	1
14	6:86810914:A:G	rs542806512	6	86810914	3.272e-08	10	10
15	6:158645336:A:G	rs576730428	6	158645336	7.108e-10	1	1
16	7:149911042:G:T	rs561189374	7	149911042	1.539e-08	1	1
17	7:154108389:A:T	rs138507927	7	154108389	2.358e-08	2	2
18	8:27464519:C:T	rs11136000	8	27464519	2.766e-08	6	6
19	9:18356094:A:G	rs192554851	9	18356094	2.989e-09	1	1
20	9:81376912:C:G	rs570028361	9	81376912	2.823e-08	2	2
21	10:100741266:A:G	rs546018638	10	100741266	4.561e-09	1	1
22	11:118302718:C:T	rs535202922	11	118302718	3.384e-13	1	1
23	12:131052809:A:G	rs184836761	12	131052809	1.85e-09	1	1
24	13:75417919:C:T	rs533330090	13	75417919	5.116e-09	1	1
25	13:113427550:A:G	rs576381927	13	113427550	3.412e-08	1	1
26	14:51600283:A:G	rs550535903	14	51600283	3.659e-08	1	1
26	14:51819391:A:G	rs527795127	14	51819391	1.056e-08	1	1
27	15:26349988:G:T	rs547455871	15	26349988	6.886e-15	1	1
28	15:42506323:A:G	rs183472759	15	42506323	5.572e-09	1	1
29	15:100714857:C:T	rs146972069	15	100714857	2.23e-08	1	1
30	16:1181498:G:T	rs564332482	16	1181498	1.719e-08	1	1
31	16:47270214:A:G	rs529505148	16	47270214	9.744e-09	9	9
32	19:45041818:G:T	rs1661184	19	45041818	4.172e-08	2	2
32	19:45193373:A:G	rs146842409	19	45193373	3.503e-08	4	4
32	19:45284627:A:G	rs80168591	19	45284627	2.003e-11	1	1
32	19:45302277:C:T	rs139997344	19	45302277	1.763e-08	1	1
32	19:45308074:A:T	rs138573164	19	45308074	1.075e-10	1	1
32	19:45324138:A:G	rs28399637	19	45324138	6.287e-13	1	1
32	19:45324756:C:G	rs28399664	19	45324756	2.337e-23	2	2
32	19:45342241:A:G	rs4239533	19	45342241	1.419e-08	8	8
32	19:45344722:A:G	rs28615360	19	45344722	6.916e-10	1	1
32	19:45345283:A:C	rs61642202	19	45345283	8.238e-10	2	2
32	19:45346666:C:G	rs148601586	19	45346666	2.484e-12	1	1
32	19:45351516:C:G	rs41289512	19	45351516	1.113e-37	3	3
32	19:45355267:A:T	rs76205446	19	45355267	4.778e-10	1	1
32	19:45355288:C:T	rs149661872	19	45355288	1.276e-10	1	1
32	19:45356141:C:T	rs2972558	19	45356141	3.321e-11	1	1
32	19:45357377:C:T	rs4803764	19	45357377	8.26e-12	12	12
32	19:45357939:A:G	rs2927468	19	45357939	4.387e-24	1	1
32	19:45358026:C:T	rs143459034	19	45358026	4.251e-10	1	1
32	19:45359945:A:G	rs183610051	19	45359945	6.171e-12	1	1
32	19:45361646:A:G	rs365653	19	45361646	2.928e-09	1	1
32	19:45363820:G:T	rs138607350	19	45363820	7.491e-16	1	1
32	19:45380970:G:T	rs11668861	19	45380970	1.561e-08	3	3
32	19:45382034:A:G	rs6859	19	45382034	2.259e-16	1	1
32	19:45382675:A:G	rs41290120	19	45382675	3.259e-08	2	2
32	19:45384116:A:G	rs406315	19	45384116	3.727e-08	3	3
32	19:45384931:A:G	rs79701229	19	45384931	7.862e-15	1	1
32	19:45385303:C:T	rs12609102	19	45385303	9.34e-14	1	1
32	19:45385356:A:C	rs144261139	19	45385356	8.084e-13	1	1
32	19:45385759:C:G	rs3745150	19	45385759	1.58e-19	4	4
32	19:45386634:C:T	rs147636938	19	45386634	4.412e-25	1	1
32	19:45390333:A:G	rs283815	19	45390333	1.507e-86	5	5
32	19:45392254:C:T	rs6857	19	45392254	9.98e-122	5	5
32	19:45393516:C:T	rs117310449	19	45393516	1.992e-11	1	1
32	19:45395266:A:G	rs157580	19	45395266	1.132e-22	7	7
32	19:45395844:A:G	rs34095326	19	45395844	1.198e-65	1	1
32	19:45396144:C:T	rs11556505	19	45396144	1.29e-95	7	7
32	19:45396665:G:T	rs59007384	19	45396665	2.26e-121	3	3
32	19:45398633:C:G	rs11668327	19	45398633	4.675e-16	1	1
32	19:45406673:A:G	rs10119	19	45406673	1.486e-84	1	1
32	19:45407788:A:G	rs7259620	19	45407788	1.105e-37	6	6
32	19:45408564:A:T	rs449647	19	45408564	1.017e-12	1	1
32	19:45408836:G:T	rs405509	19	45408836	1.729e-28	11	11
32	19:45410002:A:G	rs769449	19	45410002	6.66e-164	4	4
32	19:45410444:A:G	rs769450	19	45410444	1.225e-28	5	5
32	19:45411941:C:T	rs429358	19	45411941	2.35e-202	1	1
32	19:45412079:C:T	rs7412	19	45412079	1.3e-14	6	6
32	19:45412955:A:C	rs1081105	19	45412955	8.08e-30	13	13
32	19:45413366:C:T	rs1081106	19	45413366	1.079e-10	2	2
32	19:45413576:C:T	rs75627662	19	45413576	4.087e-81	1	1
32	19:45415935:G:T	rs7256200	19	45415935	9.24e-161	2	2
32	19:45416178:G:T	rs483082	19	45416178	9.63e-111	3	3
32	19:45416291:C:T	rs59325138	19	45416291	7.081e-30	8	8
32	19:45418486:A:G	rs12691088	19	45418486	8.664e-30	2	2
32	19:45421877:A:G	rs484195	19	45421877	9.773e-21	7	7
32	19:45422846:A:G	rs56131196	19	45422846	1.96e-123	3	3
32	19:45428234:A:G	rs66626994	19	45428234	1.48e-96	3	3
32	19:45429543:C:T	rs71352239	19	45429543	1.252e-16	2	2
32	19:45429708:C:G	rs60049679	19	45429708	1.098e-12	1	1
32	19:45435314:G:T	rs552842135	19	45435314	4.84e-08	1	1
32	19:45438554:C:T	rs7254133	19	45438554	1.454e-12	1	1
32	19:45448465:G:T	rs5167	19	45448465	1.931e-13	16	16
32	19:45479553:C:G	rs147825223	19	45479553	1.169e-11	2	2
32	19:45514061:A:G	rs187270432	19	45514061	8.141e-10	2	2
32	19:45557302:A:G	rs193187396	19	45557302	1.989e-11	2	2
32	19:45667526:A:G	rs140184899	19	45667526	2.431e-10	1	1
32	19:45696782:A:G	rs76726728	19	45696782	2.003e-10	2	2
32	19:45707917:G:T	rs582747	19	45707917	1.212e-08	15	15
32	19:45713116:A:C	rs183110257	19	45713116	5.541e-09	11	11
32	19:45740064:C:G	rs149408810	19	45740064	6.876e-11	1	1
32	19:45784241:C:T	rs138668244	19	45784241	6.51e-09	2	2
32	19:45830815:G:T	rs140574983	19	45830815	1.133e-10	1	1
32	19:45909140:C:G	rs189912081	19	45909140	1.329e-10	1	1
32	19:45959322:A:G	rs117034857	19	45959322	1.466e-10	2	2
33	20:31826339:C:T	rs78062743	20	31826339	1.511e-08	1	1
34	20:35794556:A:T	rs573127339	20	35794556	1.01e-09	4	4
35	20:40364147:C:T	rs569752694	20	40364147	5.277e-11	2	2
36	20:40716015:C:T	rs575233877	20	40716015	4.179e-09	1	1
37	22:47747652:A:G	rs529401448	22	47747652	1.232e-10	1	1
GenomicLocus : the number identifier used to refer to independent loci identifed by this GWAS
uniqID : unique ID of SNPs consists of chromosome:position:allele1:allele2 where alleles are alphabetically ordered
chr : chromosome
pos : base pair position on hg19 (GRCh37)
p : Meta analysis effect estimates were tested for significance using the two-sided z-test.
nSNPs : number of SNPs which are in LD of the independent significant SNP given r2, including non-GWAS-tagged SNPs (which are extracted from the reference panel)
nGWAS SNPs : number of GWAS-tagged SNPs which are in LD of the independent sig. SNP given r2.

## Sheet: Supplementary Table 8
Supplementary Table 8. Genome-wide significant (P<5.00E-08) lead variants in the VD GWAS Stage2
GenomicLocus	uniqID	rsID	chr	pos	p	nIndSigSNPs	IndSigSNPs
1	1:116871703:C:T	rs150423973	1	116871703	3.631e-08	1	rs150423973
2	1:120072559:A:T	rs55977072	1	120072559	4.492e-08	1	rs55977072
3	1:167628193:C:T	rs555863053	1	167628193	2.747e-08	1	rs555863053
4	2:7559484:A:C	rs543737714	2	7559484	3.004e-09	1	rs543737714
5	2:129694243:A:G	rs571573246	2	129694243	2.998e-09	1	rs571573246
6	2:170746289:A:G	rs138654898	2	170746289	1.724e-08	1	rs138654898
7	3:9967952:A:G	rs536931879	3	9967952	4.899e-08	1	rs536931879
8	4:89592499:G:T	rs79120584	4	89592499	2.448e-09	2	rs79120584;rs117164223
9	5:20583716:A:C	rs534723021	5	20583716	6.39e-09	1	rs534723021
10	5:79616698:A:G	rs200249535	5	79616698	7.551e-11	1	rs200249535
11	5:91599460:C:G	rs563370505	5	91599460	1.527e-08	1	rs563370505
12	5:148037600:A:G	rs564080066	5	148037600	2.321e-08	1	rs564080066
13	6:75160301:G:T	rs202007547	6	75160301	4.77e-08	1	rs202007547
14	6:86810914:A:G	rs542806512	6	86810914	3.272e-08	1	rs542806512
15	6:158645336:A:G	rs576730428	6	158645336	7.108e-10	1	rs576730428
16	7:149911042:G:T	rs561189374	7	149911042	1.539e-08	1	rs561189374
17	7:154108389:A:T	rs138507927	7	154108389	2.358e-08	1	rs138507927
18	8:27464519:C:T	rs11136000	8	27464519	2.766e-08	1	rs11136000
19	9:18356094:A:G	rs192554851	9	18356094	2.989e-09	1	rs192554851
20	9:81376912:C:G	rs570028361	9	81376912	2.823e-08	1	rs570028361
21	10:100741266:A:G	rs546018638	10	100741266	4.561e-09	1	rs546018638
22	11:118302718:C:T	rs535202922	11	118302718	3.384e-13	1	rs535202922
23	12:131052809:A:G	rs184836761	12	131052809	1.85e-09	1	rs184836761
24	13:75417919:C:T	rs533330090	13	75417919	5.116e-09	1	rs533330090
25	13:113427550:A:G	rs576381927	13	113427550	3.412e-08	1	rs576381927
26	14:51819391:A:G	rs527795127	14	51819391	1.056e-08	2	rs527795127;rs550535903
27	15:26349988:G:T	rs547455871	15	26349988	6.886e-15	1	rs547455871
28	15:42506323:A:G	rs183472759	15	42506323	5.572e-09	1	rs183472759
29	15:100714857:C:T	rs146972069	15	100714857	2.23e-08	1	rs146972069
30	16:1181498:G:T	rs564332482	16	1181498	1.719e-08	1	rs564332482
31	16:47270214:A:G	rs529505148	16	47270214	9.744e-09	1	rs529505148
32	19:45041818:G:T	rs1661184	19	45041818	4.172e-08	1	rs1661184
32	19:45284627:A:G	rs80168591	19	45284627	2.003e-11	3	rs80168591;rs148601586;rs183610051
32	19:45324138:A:G	rs28399637	19	45324138	6.287e-13	2	rs28399637;rs4803764
32	19:45344722:A:G	rs28615360	19	45344722	6.916e-10	4	rs28615360;rs61642202;rs76205446;rs143459034
32	19:45355288:C:T	rs149661872	19	45355288	1.276e-10	6	rs149661872;rs143459034;rs144261139;rs117310449;rs61642202;rs76205446
32	19:45357939:A:G	rs2927468	19	45357939	4.387e-24	4	rs2927468;rs4239533;rs2972558;rs4803764
32	19:45361646:A:G	rs365653	19	45361646	2.928e-09	1	rs365653
32	19:45363820:G:T	rs138607350	19	45363820	7.491e-16	2	rs138607350;rs139997344
32	19:45382034:A:G	rs6859	19	45382034	2.259e-16	3	rs6859;rs406315;rs11668861
32	19:45384931:A:G	rs79701229	19	45384931	7.862e-15	3	rs79701229;rs148601586;rs183610051
32	19:45385303:C:T	rs12609102	19	45385303	9.34e-14	1	rs12609102
32	19:45386634:C:T	rs147636938	19	45386634	4.412e-25	5	rs147636938;rs6857;rs117310449;rs1081105;rs144261139
32	19:45395844:A:G	rs34095326	19	45395844	1.198e-65	8	rs34095326;rs11556505;rs769449;rs12691088;rs28399664;rs41289512;rs406315;rs6857
32	19:45398633:C:G	rs11668327	19	45398633	4.675e-16	5	rs11668327;rs10119;rs449647;rs41290120;rs157580
32	19:45407788:A:G	rs7259620	19	45407788	1.105e-37	9	rs7259620;rs405509;rs769450;rs59325138;rs484195;rs71352239;rs3745150;rs157580;rs10119
32	19:45411941:C:T	rs429358	19	45411941	2.35e-202	15	rs429358;rs1081105;rs75627662;rs7256200;rs483082;rs484195;rs56131196;rs66626994;rs283815;rs6857;rs157580;rs11556505;rs59007384;rs10119;rs769449
32	19:45412079:C:T	rs7412	19	45412079	1.3e-14	5	rs7412;rs75627662;rs483082;rs41290120;rs59007384
32	19:45413366:C:T	rs1081106	19	45413366	1.079e-10	3	rs1081106;rs59325138;rs406315
32	19:45429708:C:G	rs60049679	19	45429708	1.098e-12	1	rs60049679
32	19:45435314:G:T	rs552842135	19	45435314	4.84e-08	1	rs552842135
32	19:45438554:C:T	rs7254133	19	45438554	1.454e-12	1	rs7254133
32	19:45448465:G:T	rs5167	19	45448465	1.931e-13	1	rs5167
32	19:45479553:C:G	rs147825223	19	45479553	1.169e-11	5	rs147825223;rs140184899;rs138668244;rs146842409;rs138573164
32	19:45557302:A:G	rs193187396	19	45557302	1.989e-11	3	rs193187396;rs12691088;rs187270432
32	19:45696782:A:G	rs76726728	19	45696782	2.003e-10	1	rs76726728
32	19:45707917:G:T	rs582747	19	45707917	1.212e-08	1	rs582747
32	19:45713116:A:C	rs183110257	19	45713116	5.541e-09	1	rs183110257
32	19:45740064:C:G	rs149408810	19	45740064	6.876e-11	2	rs149408810;rs138668244
32	19:45830815:G:T	rs140574983	19	45830815	1.133e-10	2	rs140574983;rs189912081
32	19:45959322:A:G	rs117034857	19	45959322	1.466e-10	1	rs117034857
33	20:31826339:C:T	rs78062743	20	31826339	1.511e-08	1	rs78062743
34	20:35794556:A:T	rs573127339	20	35794556	1.01e-09	1	rs573127339
35	20:40364147:C:T	rs569752694	20	40364147	5.277e-11	1	rs569752694
36	20:40716015:C:T	rs575233877	20	40716015	4.179e-09	1	rs575233877
37	22:47747652:A:G	rs529401448	22	47747652	1.232e-10	1	rs529401448
Genomi Locus : Index of assigned genomic locus matched with "Genomic risk loci" table. Multiple lead SNPs can be assigned to the same genomic locus.
uniqID : Unique ID of SNPs consisting of chr:position:allele1:allele2 where alleles are alphabetically ordered.
rsID : rsID based on dbSNP build 146.
chr : chromosome
pos : position on hg19
P-value : P-value (from the VD GWAS Stage1).
nIndSigSNPs : Number of independent significant SNPs which are in LD with the lead SNP at r2 0.1.
IndSigSNPs : rsID of independent significant SNPs which are in LD with the lead SNP at r2 0.1.

## Sheet: Supplementary Table 9
Supplementary Table 9. Summary of 55 associated signals (P<5.00E-08) at 38 loci in the stepwise conditional analysis of the VD GWAS Stage2
Chr	SNP	Position	A1	A1 Freq	Beta	SE	p-value	N	Freq Ref	Beta (conditional)	SE (conditional)	p-value (conditional)	LD r
1	rs555863053	167628193	T	0.0001	3.8996	0.7018	2.75129e-08	2789030	0.000994036	3.8996	0.701804	2.75176e-08	0
5	rs534723021	20583716	A	0.0002	4.0688	0.7008	6.40074e-09	1398620	0.000994036	4.0688	0.700808	6.40333e-09	0
5	rs563370505	91599460	C	0.9996	-3.1345	0.5539	1.5229e-08	1119640	0.998012	-3.1345	0.553908	1.52359e-08	0
5	rs564080066	148037600	A	0.9977	-1.0359	0.1854	2.30523e-08	1741350	0.999006	-1.0359	0.185402	2.30587e-08	0
6	rs202007547	75160301	T	0.9996	-4.0564	0.743	4.77508e-08	622239	0.998012	-4.0564	0.743017	4.77848e-08	0
6	rs576730428	158645336	A	0.0001	5.255	0.8526	7.11544e-10	1889670	0.000994036	5.255	0.852608	7.11816e-10	0
7	rs182201130	142969704	A	0.0006	-0.4557	0.8309	0.583389	331783	0.00198807	-26.4479	1.5957	1.06512e-61	-0.498004
7	rs150590372	146646349	A	0.9998	-3.1159	1.4415	0.0306515	330570	0.998012	-26.1821	2.0003	3.80144e-39	0.00399202
7	rs561189374	149911042	T	0.001	3.7286	0.6591	1.53945e-08	316469	0.00198807	30.1576	1.56119	3.86095e-83	-0.244482
7	rs149173377	156853678	T	0.9882	0.2098	0.1429	0.142061	576832	0.992048	1.41427	0.155891	1.16642e-19	0.00567402
7	rs79924001	158509571	A	0.005	-0.4876	0.287	0.0893277	335183	0.000994036	-9.51319	0.548261	1.91944e-67	0
8	rs11136000	27464519	T	0.411	-0.1074	0.0193	2.62503e-08	1523210	0.387674	-0.1074	0.0193002	2.62586e-08	0
9	rs570028361	81376912	C	0.9948	-2.0568	0.3705	2.83363e-08	193401	0.998012	-2.0568	0.370529	2.84058e-08	0
10	rs546018638	100741266	A	0.9999	-4.8774	0.832	4.5661e-09	1984410	0.999006	-4.8774	0.832007	4.56746e-09	0
12	rs148662852	118974930	A	0.9898	-0.1415	0.0993	0.154164	1379730	0.996024	-2.02383	0.13149	1.86712e-53	-0.00565687
12	rs147912572	119007792	T	0.999	-1.1221	0.3298	0.000668053	1264070	0.998012	-11.1509	0.568832	1.4555e-85	-0.312114
12	rs141121391	119776035	A	0.0112	-0.0943	0.1001	0.346163	1237790	0.00497018	-1.14222	0.113726	9.79863e-24	-0.00633091
12	rs182745729	124712372	T	0.0085	-0.2197	0.1111	0.0479854	1320380	0.00198807	-6.08521	0.280355	1.82413e-104	-0.00399202
12	rs560296818	126688477	T	0.0005	2.4506	0.7226	0.000695455	526361	0.00198807	10.0996	0.955224	3.97344e-26	0.244482
12	rs113778353	128311352	T	0.0051	0.583	0.1607	0.00028576	1048230	0.00795229	1.07808	0.17013	2.34555e-10	-0.00567402
12	rs184836761	131052809	A	0.0002	4.5144	0.7511	1.85084e-09	1217560	0.000994036	44.0051	1.71992	2.21118e-144	0.706402
12	rs192156529	133411828	C	0.0028	-0.3368	0.2087	0.106571	1129420	0.00198807	-4.71741	0.347095	4.52137e-42	-0.00399202
12	rs557987436	133425595	T	0.0021	-0.7291	0.3242	0.0245176	623600	0.00198807	-2.82094	0.379154	1.00625e-13	0
13	rs533330090	75417919	T	0.0007	3.6903	0.6315	5.10523e-09	492347	0.000994036	3.6903	0.631521	5.11126e-09	0
14	rs527795127	51819391	A	0.0005	2.7189	0.4752	1.05531e-08	1217090	0.000994036	2.7189	0.475206	1.05578e-08	0
15	rs75411530	25786330	T	0.0188	0.2049	0.0725	0.00471028	1416600	0.0248509	0.419373	0.0732482	1.03208e-08	0.0144495
15	rs547455871	26349988	T	0.9998	-5.0513	0.6487	6.87252e-15	1632280	0.998012	-36.8374	1.39786	4.77325e-153	0.405394
15	rs563032820	30013695	C	0.9995	0.7491	0.4078	0.0662202	1652700	0.997018	14.9921	0.68053	1.48417e-107	-0.431619
15	rs577984658	31068572	T	0.0054	0.3117	0.1251	0.0127167	1634120	0.00695825	1.89884	0.149754	7.6602e-37	0.0053022
15	rs188328914	33218182	T	0.9978	0.4542	0.2129	0.0328923	1380460	0.999006	11.1413	0.465062	7.89186e-127	-0.00281997
15	rs149402468	37079890	A	0.9937	-0.4312	0.1256	0.000596676	1390790	0.998012	-1.6878	0.142478	2.25652e-32	-0.00565687
15	rs116102546	38802508	A	0.9968	-0.1703	0.1774	0.337067	1368280	0.996024	-4.77615	0.261506	1.60049e-74	0
19	rs117671432	35897256	A	0.0195	-0.1379	0.0861	0.109238	969063	0.00497018	-0.723	0.0874994	1.42162e-16	0.0710956
19	rs10417126	40424894	C	0.1399	-0.0563	0.0277	0.042104	1487700	0.128231	-0.193498	0.0283015	8.08607e-12	-0.0116847
19	rs146409455	41183423	T	0.0011	1.0469	0.2542	3.81494e-05	1934510	0.00497018	2.4045	0.25728	9.11493e-21	-0.00776151
19	rs182783993	41827089	T	0.0081	-0.2113	0.1243	0.0891461	1106480	0.00298211	-0.846154	0.126698	2.41355e-11	-0.00693514
19	rs180738500	42496631	T	0.0019	0.7491	0.1953	0.000125239	1898920	0.00397614	1.82975	0.198244	2.7119e-20	-0.00565687
19	rs527435212	43578323	T	0.0048	-0.0859	0.1577	0.585956	1156180	0.00198807	-6.56899	0.258161	7.95344e-143	0.350019
19	rs556444413	44389112	A	0.0054	0.3285	0.1375	0.0168901	1352670	0.00397614	3.50317	0.18914	1.38329e-76	-0.00565687
19	rs182943886	44636030	A	0.0005	-1.0383	0.4361	0.0172715	1445160	0.00198807	-4.5039	0.445253	4.72233e-24	0.0314421
19	rs12977877	45245172	A	0.3668	0.0158	0.0198	0.424882	1508480	0.33499	0.119461	0.0204486	5.15704e-09	0.135891
19	rs80168591	45284627	A	0.0145	0.4913	0.0733	2.04754e-11	1788950	0.00695825	1.94358	0.0995895	8.04543e-85	0.0287611
19	rs2972558	45356141	T	0.7117	0.143	0.0216	3.583e-11	1434760	0.706759	0.221485	0.0221664	1.65384e-23	-0.0209618
19	rs429358	45411941	T	0.8341	-0.6919	0.0228	2.7951e-202	1908520	0.84493	-1.14352	0.0266378	0	0.106494
19	rs5167	45448465	T	0.6103	-0.1433	0.0195	2.00117e-13	1518740	0.633201	-0.2022	0.0200167	5.43782e-24	0.0139195
19	rs527221	46275976	C	0.1359	0.0429	0.0279	0.124138	1502620	0.111332	0.195363	0.0287234	1.03525e-11	-0.021955
19	rs185975215	46979409	A	0.002	-0.2983	0.201	0.137788	1703290	0.000994036	-1.99374	0.204973	2.31692e-22	-0.0357057
19	rs74732309	51013118	A	0.266	-0.0561	0.0214	0.0087545	1536150	0.237575	-0.251543	0.0219912	2.68912e-30	0.0297652
19	rs57897227	51283724	A	0.3039	-0.0208	0.0208	0.317311	1500760	0.308151	-0.276538	0.0219785	2.64519e-36	0.0463362
19	rs560004061	52156583	A	0.001	0.8977	0.3576	0.0120613	1075170	0.00298211	10.5608	0.533598	3.51324e-87	0.109307
19	rs73054282	52640949	A	0.3318	0.036	0.0203	0.0761626	1503370	0.343936	0.198818	0.0208429	1.44374e-21	-0.039062
19	rs188425094	53323262	C	0.0176	-0.157	0.0731	0.0317342	1486640	0.0149105	-0.549206	0.0743329	1.48533e-13	0.0427124
19	rs10420317	53713864	C	0.3731	-0.0478	0.0197	0.0152496	1513160	0.351889	-0.25194	0.0206193	2.47253e-34	-0.0469795
19	rs562590887	53984379	C	0.0022	-0.3028	0.2137	0.156501	1370140	0.000994036	-9.91875	0.387042	7.61765e-145	0
20	rs573127339	35794556	A	0.0003	3.8213	0.6256	1.00751e-09	1170150	0.000994036	3.8213	0.62561	1.00811e-09	0
Chr : chromosome
Position : base pair position (GRCh37)
A1 : coded allele
A1 Freq : coded allele frequency
Beta : unconditional effect size
SE : standard error
p-value ：Meta analysis effect estimates were tested for significance using the two-sided z-test.
N : effective sample size
Freq Ref : allele frequency in LD reference genotype data
Beta/SE/p-value (conditional) : effect size/SE/p-value of SNP conditional on leading SNP(s) in locus
LD r : linkage disequilibrium r measurement between SNP and leading SNP.

[truncated: 32 more sheets: Supplementary Table 10, Supplementary Table 11, Supplementary Table 12, Supplementary Table 13, Supplementary Table 14, Supplementary Table 15, Supplementary Table 16, Supplementary Table 17, Supplementary Table 18, Supplementary Table 19, Supplementary Table 20, Supplementary Table 21, Supplementary Table 22, Supplementary Table 23, Supplementary Table 24, Supplementary Table 25, Supplementary Table 26, Supplementary Table 27, Supplementary Table 28, Supplementary Table 29 …]
